# Supplementary material for: Pseudomonas Lipopeptide-Mediated Biocontrol: Chemotaxonomy and Biological Activity
Source: MDPI journal article supplement (doi:10.3390/molecules27020372), 2022-01-07
Supplement: s1 [file s1]

**Table S1.** Comparative Genome Blast Analysis of Reference genome (Pf0-1, accession number: NC\_007492) CDS with CDS of Lipopeptides Biosynthetic Gene Clusters (BGCs) in Query genomes. Blast Hits of BGC genes/products are highlighted blue. BGC-coding genes are flanked by upstream and/or downstream by transcriptional regulators and transport genes.

| Sequence ID | Hit Sequence ID | Hit File                              | Hit Gene | Hit Product                                                       | Percent Identity |
|-------------|-----------------|---------------------------------------|----------|-------------------------------------------------------------------|------------------|
| NC_007492   | NZ_CM001513     | P._lactis_SS101.gb                    |          | copper chaperone PCu(A)C                                          | 87.04            |
| NC_007492   | NZ_LT629778     | P._granadensis_LMG_27940.gb           |          | copper chaperone PCu(A)C                                          | 83.51            |
| NC_007492   | NC_020209       | P._poae_RE1_1_14.gb                   |          | copper chaperone PCu(A)C                                          | 83.41            |
| NC_007492   | NZ_CP023299     | P._mosselii_BS011.gb                  |          | copper chaperone PCu(A)C                                          | 80.62            |
| NC_007492   | NZ_CP020369     | P._tolaasii_2192T.gb                  |          | copper chaperone PCu(A)C                                          | 84.97            |
| NC_007492   | NZ_CP011789     | P._putida_PC2.gb                      |          | copper chaperone PCu(A)C                                          | 82.48            |
| NC_007492   | CT573326        | P._entomophilia_L48.gb                |          | conserved hypothetical protein. putative signal peptide           | 84.40            |
| NC_007492   | NZ_CP029608     | P._kribbensis_46_2.gb                 |          | copper chaperone PCu(A)C                                          | 88.12            |
| NC_007492   | NZ_CP006256     | P._syringae_pv._syringae_HS191.gb     |          | copper chaperone PCu(A)C                                          | 80.60            |
| NC_007492   | NC_012660       | P._fluorescens_SBW25.gb               |          | copper chaperone PCu(A)C                                          | 83.01            |
| NC_007492   | CP028826        | P._fluorescens_MS82.gb                |          | copper chaperone PCu(A)C                                          | 97.48            |
| NC_007492   | CP027716        | P._chlororaphis_PBST_2.gb             |          | Cytochrome oxidase biogenesis protein Sco1/SenC/PrrC              | 83.00            |
| NC_007492   | NC_007005       | P._syringae_pv._syringae_B728a.gb     |          | SCO family protein                                                | 82.51            |
| NC_007492   | CP024085        | P._putida_E41.gb                      |          | SCO family protein                                                | 82.39            |
| NC_007492   | CT573326        | P._entomophilia_L48.gb                |          | conserved hypothetical protein. putative Sco1/SenC family protein | 80.07            |
| NC_007492   | NZ_CP007039     | P._cichorii_JBC1.gb                   |          | SCO family protein                                                | 81.46            |
| NC_007492   | NC_021237       | P._protegens_CHA0.gb                  |          | SCO family protein                                                | 82.78            |
| NC_007492   | NZ_CP005969     | P._syringae_pv._syringae_B301D.gb     |          | SCO family protein                                                | 82.80            |
| NC_007492   | NZ_LT629796     | P._mandelii_LMG_21607.gb              |          | SCO family protein                                                | 81.89            |
| NC_007492   | NZ_CP077074     | P._sessilinigenes_CM12a.gb            |          | SCO family protein                                                | 81.94            |
| NC_007492   | NC_004129       | P._protegens_Pf_5.gb                  |          | SCO family protein                                                | 83.25            |
| NC_007492   | AE016853        | P._syringae_pv._tomato_str._DC3000.gb |          | Sco1/SenC family protein                                          | 81.61            |
| NC_007492   | LT629761        | P._chlororaphis_DSM_21509.gb          |          | protein SCO1/2                                                    | 83.50            |
| NC_007492   | NZ_CP023299     | P._mosselii_BS011.gb                  |          | SCO family protein                                                | 85.00            |
| NC_007492   | NZ_CP009365     | P._soli_SJ10.gb                       |          | SCO family protein                                                | 84.11            |
| NC_007492   | NZ_CP006256     | P._syringae_pv._syringae_HS191.gb     |          | SCO family protein                                                | 80.85            |
| NC_007492   | CP028826        | P._fluorescens_MS82.gb                |          | SCO family protein                                                | 97.85            |
| NC_007492   | NZ_CP011789     | P._putida_PC2.gb                      |          | SCO family protein                                                | 81.52            |
| NC_007492   | NZ_CP029608     | P._kribbensis_46_2.gb                 |          | SCO family protein                                                | 93.56            |
| NC_007492   | NZ_CP020369     | P._tolaasii_2192T.gb                  |          | SCO family protein                                                | 80.24            |
| NC_007492   | NC_020209       | P._poae_RE1_1_14.gb                   |          | SCO family protein                                                | 80.00            |
| NC_007492   | LT629761        | P._chlororaphis_DSM_21509.gb          |          | protein SCO1/2                                                    | 83.50            |
| NC_007492   | NZ_LT629777     | P._asplenii_ATCC_23835.gb             |          | SCO family protein                                                | 84.10            |
| NC_007492   | NZ_LT629972     | P._fuscovaginae_LMG_2158.gb           |          | SCO family protein                                                | 83.66            |
| NC_007492   | NZ_CP005969     | P._syringae_pv._syringae_B301D.gb     |          | SCO family protein                                                | 82.80            |
| NC_007492   | NC_012660       | P._fluorescens_SBW25.gb               |          | SCO family protein                                                | 81.82            |
| NC_007492   | NZ_AP014522     | P._protegens_Cab57.gb                 |          | SCO family protein                                                | 82.78            |

|           |                    |                                    |      |                                                                      |       |
|-----------|--------------------|------------------------------------|------|----------------------------------------------------------------------|-------|
| NC_007492 | NZ_LT629778        | P_granadensis_LMG_27940.gb         |      | SCO family protein                                                   | 86.47 |
| NC_007492 | NC_021237          | P_protegens_CHA0.gb                |      | efflux transporter outer membrane subunit                            | 81.29 |
| NC_007492 | NZ_CP023299        | P_mosselii_BS011.gb                |      | AdeC/AdeK/OprM family multidrug efflux complex outer membrane factor | 81.00 |
| NC_007492 | NZ_LT629778        | P_granadensis_LMG_27940.gb         |      | efflux transporter outer membrane subunit                            | 82.67 |
| NC_007492 | NC_004129          | P_protegens_Pf_5.gb                |      | efflux transporter outer membrane subunit                            | 81.40 |
| NC_007492 | NC_004129          | P_protegens_Pf_5.gb                |      | efflux RND transporter outer membrane subunit EmhC                   | 80.67 |
| NC_007492 | NC_012660          | P_fluorescens_SBW25.gb             |      | AdeC/AdeK/OprM family multidrug efflux complex outer membrane factor | 83.65 |
| NC_007492 | NZ_CP007410        | P_brassicacearum_DF41.gb           | adeC | AdeC/AdeK/OprM family multidrug efflux complex outer membrane factor | 83.02 |
| NC_007492 | AE016853           | P_syringae_pv_tomato_str_DC3000.gb |      | outer membrane efflux protein                                        | 83.80 |
| NC_007492 | NZ_LT629790        | P_mediterranea_DSM_16733.gb        | adeC | AdeC/AdeK/OprM family multidrug efflux complex outer membrane factor | 85.56 |
| NC_007492 | NC_007005          | P_syringae_pv_syringae_B728a.gb    |      | AdeC/AdeK/OprM family multidrug efflux complex outer membrane factor | 80.34 |
| NC_007492 | CP024085           | P_putida_E41.gb                    |      | multidrug transporter                                                | 81.93 |
| NC_007492 | LT629761           | P_chlororaphis_DSM_21509.gb        |      | outer membrane protein, multidrug efflux system                      | 80.04 |
| NC_007492 | NZ_LT629796        | P_mandelii_LMG_21607.gb            | emhC | efflux RND transporter outer membrane subunit EmhC                   | 83.58 |
| NC_007492 | CP024085           | P_putida_E41.gb                    |      | multidrug transporter                                                | 82.55 |
| NC_007492 | NZ_LT629778        | P_granadensis_LMG_27940.gb         | emhC | efflux RND transporter outer membrane subunit EmhC                   | 81.76 |
| NC_007492 | NZ_CM001513        | P_lactis_SS101.gb                  |      | efflux transporter outer membrane subunit                            | 85.88 |
| NC_007492 | NC_021237          | P_protegens_CHA0.gb                | adeC | AdeC/AdeK/OprM family multidrug efflux complex outer membrane factor | 82.74 |
| NC_007492 | NZ_CP035088        | P_viciae_11K1.gb                   | adeC | AdeC/AdeK/OprM family multidrug efflux complex outer membrane factor | 83.84 |
| NC_007492 | NZ_CP077074        | P_sessiliniigenes_CM12a.gb         |      | efflux transporter outer membrane subunit                            | 82.23 |
| NC_007492 | NZ_CP020369        | P_tolaasii_2192T.gb                | adeC | AdeC/AdeK/OprM family multidrug efflux complex outer membrane factor | 82.99 |
| NC_007492 | CP027716           | P_chlororaphis_PBSt_2.gb           |      | Multidrug efflux system, outer membrane factor lipoprotein OprM      | 81.02 |
| NC_007492 | NZ_JAHSTY010000001 | P_azadiae_SWRI103.gb               |      | efflux transporter outer membrane subunit                            | 80.31 |
| NC_007492 | NZ_CP007039        | P_cichorii_JBC1.gb                 |      | AdeC/AdeK/OprM family multidrug efflux complex outer membrane factor | 80.76 |
| NC_007492 | NZ_CP009365        | P_soli_SJ10.gb                     |      | AdeC/AdeK/OprM family multidrug efflux complex outer membrane factor | 81.82 |
| NC_007492 | NZ_CP035088        | P_viciae_11K1.gb                   | adeC | AdeC/AdeK/OprM family multidrug efflux complex outer membrane factor | 81.60 |
| NC_007492 | NZ_CP005969        | P_syringae_pv_syringae_B301D.gb    | adeC | AdeC/AdeK/OprM family multidrug efflux complex outer membrane factor | 83.74 |
| NC_007492 | NZ_CM001513        | P_lactis_SS101.gb                  |      | AdeC/AdeK/OprM family multidrug efflux complex outer membrane factor | 80.65 |
| NC_007492 | LT629761           | P_chlororaphis_DSM_21509.gb        |      | outer membrane protein, multidrug efflux system                      | 80.04 |
| NC_007492 | NZ_AP014522        | P_protegens_Cab57.gb               |      | efflux transporter outer membrane subunit                            | 81.40 |
| NC_007492 | NZ_CP020369        | P_tolaasii_2192T.gb                | adeC | AdeC/AdeK/OprM family multidrug efflux complex outer membrane factor | 80.00 |
| NC_007492 | NZ_CP006256        | P_syringae_pv_syringae_HS191.gb    | adeC | AdeC/AdeK/OprM family multidrug efflux complex outer membrane factor | 81.01 |
| NC_007492 | NC_007005          | P_syringae_pv_syringae_B728a.gb    | adeC | AdeC/AdeK/OprM family multidrug efflux complex outer membrane factor | 82.93 |
| NC_007492 | CP028826           | P_fluorescens_MS82.gb              |      | multidrug transporter                                                | 94.20 |
| NC_007492 | NZ_CP029608        | P_kribbensis_46_2.gb               | adeC | efflux RND transporter outer membrane subunit EmhC                   | 80.86 |
| NC_007492 | NZ_CP007410        | P_brassicacearum_DF41.gb           | adeC | AdeC/AdeK/OprM family multidrug efflux complex outer membrane factor | 83.29 |
| NC_007492 | NZ_LT629790        | P_mediterranea_DSM_16733.gb        | adeC | AdeC/AdeK/OprM family multidrug efflux complex outer membrane factor | 83.05 |
| NC_007492 | CT573326           | P_entomophilia_L48.gb              | ttgC | multidrug/solvent efflux outer membrane protein TtgC, RND family     | 80.71 |
| NC_007492 | NZ_CP011789        | P_putida_PC2.gb                    |      | AdeC/AdeK/OprM family multidrug efflux complex outer membrane factor | 83.91 |
| NC_007492 | NZ_CP029608        | P_kribbensis_46_2.gb               |      | efflux transporter outer membrane subunit                            | 86.45 |
| NC_007492 | CT573326           | P_entomophilia_L48.gb              | oprM | Outer membrane protein oprM precursor                                | 81.82 |

|           |                    |                                   |      |                                                                      |       |
|-----------|--------------------|-----------------------------------|------|----------------------------------------------------------------------|-------|
| NC_007492 | NZ_AP014522        | P._protegens_Cab57.gb             | adeC | AdeC/AdeK/OprM family multidrug efflux complex outer membrane factor | 82.54 |
| NC_007492 | NZ_CP011789        | P._putida_PC2.gb                  |      | efflux transporter outer membrane subunit                            | 81.56 |
| NC_007492 | CP028826           | P._fluorescens_MS82.gb            |      | AdeC/AdeK/OprM family multidrug efflux complex outer membrane factor | 81.15 |
| NC_007492 | NZ_CP006256        | P._syringae_pv._syringae_HS191.gb |      | AdeC/AdeK/OprM family multidrug efflux complex outer membrane factor | 81.95 |
| NC_007492 | NZ_CP005969        | P._syringae_pv._syringae_B301D.gb | adeC | AdeC/AdeK/OprM family multidrug efflux complex outer membrane factor | 83.74 |
| NC_007492 | NZ_CP077074        | P._sessilinigenes_CM12a.gb        | adeC | AdeC/AdeK/OprM family multidrug efflux complex outer membrane factor | 80.67 |
| NC_007492 | NC_020209          | P._poae_RE1_1_14.gb               |      | LuxR family transcriptional regulator                                | 83.10 |
| NC_007492 | NC_012660          | P._fluorescens_SBW25.gb           |      | LuxR family transcriptional regulator                                | 83.89 |
| NC_007492 | NZ_CP035088        | P._viciae_11K1.gb                 |      | helix-turn-helix transcriptional regulator                           | 81.76 |
| NC_007492 | NZ_CP007410        | P._brassicacearum_DF41.gb         |      | LuxR family transcriptional regulator                                | 82.39 |
| NC_007492 | NZ_CP023299        | P._mosselii_BS011.gb              |      | LuxR C-terminal-related transcriptional regulator                    | 85.45 |
| NC_007492 | NZ_CP011789        | P._putida_PC2.gb                  |      | helix-turn-helix transcriptional regulator                           | 83.02 |
| NC_007492 | CP028826           | P._fluorescens_MS82.gb            |      | helix-turn-helix transcriptional regulator                           | 92.96 |
| NC_007492 | CP027716           | P._chlororaphis_PBS2_2.gb         |      | Transcriptional regulator, LuxR family                               | 88.48 |
| NC_007492 | NZ_LT629777        | P._asplenii_ATCC_23835.gb         |      | LuxR family transcriptional regulator                                | 82.79 |
| NC_007492 | NZ_AP014522        | P._protegens_Cab57.gb             |      | helix-turn-helix transcriptional regulator                           | 84.85 |
| NC_007492 | NZ_LT629790        | P._mediterranea_DSM_16733.gb      |      | helix-turn-helix transcriptional regulator                           | 83.65 |
| NC_007492 | NZ_LT629777        | P._asplenii_ATCC_23835.gb         |      | helix-turn-helix transcriptional regulator                           | 82.76 |
| NC_007492 | NZ_LT629972        | P._fuscovaginae_LMG_2158.gb       |      | helix-turn-helix transcriptional regulator                           | 82.76 |
| NC_007492 | CP024085           | P._putida_E41.gb                  |      | helix-turn-helix transcriptional regulator                           | 82.39 |
| NC_007492 | NZ_CP029608        | P._kribbensis_46_2.gb             |      | LuxR family transcriptional regulator                                | 85.91 |
| NC_007492 | NC_021237          | P._protegens_CHA0.gb              |      | helix-turn-helix transcriptional regulator                           | 83.98 |
| NC_007492 | NZ_CP009365        | P._soli_SJ10.gb                   |      | LuxR C-terminal-related transcriptional regulator                    | 84.00 |
| NC_007492 | NZ_CM001513        | P._lactis_SS101.gb                |      | LuxR family transcriptional regulator                                | 85.21 |
| NC_007492 | NZ_CP020369        | P._tolaasii_2192T.gb              |      | helix-turn-helix transcriptional regulator                           | 80.21 |
| NC_007492 | LT629761           | P._chlororaphis_DSM_21509.gb      |      | transcriptional regulator, LuxR family                               | 90.05 |
| NC_007492 | NZ_JAHSTY010000001 | P._azadiae_SWRI103.gb             |      | LuxR C-terminal-related transcriptional regulator                    | 80.00 |
| NC_007492 | LT629761           | P._chlororaphis_DSM_21509.gb      |      | transcriptional regulator, LuxR family                               | 90.05 |
| NC_007492 | NC_004129          | P._protegens_Pf_5.gb              |      | helix-turn-helix transcriptional regulator                           | 83.98 |
| NC_007492 | NZ_LT629972        | P._fuscovaginae_LMG_2158.gb       |      | LuxR family transcriptional regulator                                | 83.61 |
| NC_007492 | NZ_CP077074        | P._sessilinigenes_CM12a.gb        |      | helix-turn-helix transcriptional regulator                           | 84.36 |
| NC_007492 | NZ_CP035088        | P._viciae_11K1.gb                 |      | non-ribosomal peptide synthase/polyketide synthase                   | 82.24 |
| NC_007492 | NZ_CP005969        | P._syringae_pv._syringae_B301D.gb |      | amino acid adenylation domain-containing protein                     | 86.16 |
| NC_007492 | NZ_CP005969        | P._syringae_pv._syringae_B301D.gb |      | non-ribosomal peptide synthetase                                     | 83.54 |
| NC_007492 | NZ_CP006256        | P._syringae_pv._syringae_HS191.gb |      | non-ribosomal peptide synthase/polyketide synthase                   | 83.23 |
| NC_007492 | NZ_CM001513        | P._lactis_SS101.gb                |      | non-ribosomal peptide synthetase                                     | 81.76 |
| NC_007492 | NZ_CP006256        | P._syringae_pv._syringae_HS191.gb | sypA | syringopeptin non-ribosomal peptide synthetase SypA                  | 82.50 |
| NC_007492 | NZ_CP007410        | P._brassicacearum_DF41.gb         |      | non-ribosomal peptide synthetase                                     | 86.00 |
| NC_007492 | NZ_LT629972        | P._fuscovaginae_LMG_2158.gb       |      | non-ribosomal peptide synthetase                                     | 83.93 |
| NC_007492 | NZ_CP006256        | P._syringae_pv._syringae_HS191.gb |      | non-ribosomal peptide synthetase                                     | 87.65 |
| NC_007492 | NZ_LT629972        | P._fuscovaginae_LMG_2158.gb       |      | non-ribosomal peptide synthetase                                     | 81.40 |

|           |                    |                                      |      |                                                           |       |
|-----------|--------------------|--------------------------------------|------|-----------------------------------------------------------|-------|
| NC_007492 | AE016853           | P._syringae_pv._tomato_str_DC3000.gb | syfA | non-ribosomal peptide synthetase SyfA                     | 82.58 |
| NC_007492 | NZ_CP020369        | P._tolaasii_2192T.gb                 |      | non-ribosomal peptide synthetase                          | 81.68 |
| NC_007492 | LT629761           | P._chlororaphis_DSM_21509.gb         |      | arthrofactin-type cyclic lipopeptide synthetase A         | 85.25 |
| NC_007492 | NC_007005          | P._syringae_pv._syringae_B728a.gb    | sypB | syringopeptin non-ribosomal peptide synthetase SypB       | 80.00 |
| NC_007492 | NZ_CP020369        | P._tolaasii_2192T.gb                 |      | amino acid adenylation domain-containing protein          | 83.82 |
| NC_007492 | NC_004129          | P._protegens_Pf_5.gb                 |      | non-ribosomal peptide synthetase                          | 82.91 |
| NC_007492 | NZ_CP005969        | P._syringae_pv._syringae_B301D.gb    |      | amino acid adenylation domain-containing protein          | 86.16 |
| NC_007492 | CP027716           | P._chlororaphis_PBSt_2.gb            |      | Siderophore biosynthesis non-ribosomal peptide synthetase | 81.46 |
| NC_007492 | NZ_CP023299        | P._mosselii_BS011.gb                 |      | amino acid adenylation domain-containing protein          | 85.83 |
| NC_007492 | NZ_CP005969        | P._syringae_pv._syringae_B301D.gb    | sypA | syringopeptin non-ribosomal peptide synthetase SypA       | 81.65 |
| NC_007492 | NC_021237          | P._protegens_CHA0.gb                 |      | non-ribosomal peptide synthetase                          | 82.91 |
| NC_007492 | NZ_CP005969        | P._syringae_pv._syringae_B301D.gb    |      | amino acid adenylation domain-containing protein          | 80.09 |
| NC_007492 | NC_007005          | P._syringae_pv._syringae_B728a.gb    | sypA | syringopeptin non-ribosomal peptide synthetase SypA       | 82.44 |
| NC_007492 | NZ_LT629777        | P._asplenii_ATCC_23835.gb            |      | non-ribosomal peptide synthetase                          | 85.96 |
| NC_007492 | NZ_CP020369        | P._tolaasii_2192T.gb                 |      | amino acid adenylation domain-containing protein          | 86.57 |
| NC_007492 | NZ_CP035088        | P._viciae_11K1.gb                    |      | non-ribosomal peptide synthetase                          | 82.79 |
| NC_007492 | NZ_AP014522        | P._protegens_Cab57.gb                | ofaB | orfamide A non-ribosomal peptide synthetase OfaB          | 81.87 |
| NC_007492 | NZ_JAHSTY010000001 | P._azadiae_SWRI103.gb                |      | amino acid adenylation domain-containing protein          | 87.18 |
| NC_007492 | LT629761           | P._chlororaphis_DSM_21509.gb         |      | arthrofactin-type cyclic lipopeptide synthetase C         | 81.75 |
| NC_007492 | NZ_AP014522        | P._protegens_Cab57.gb                | ofaA | orfamide A non-ribosomal peptide synthetase OfaA          | 85.80 |
| NC_007492 | NZ_CP005969        | P._syringae_pv._syringae_B301D.gb    | sypA | syringopeptin non-ribosomal peptide synthetase SypA       | 81.65 |
| NC_007492 | NZ_CP009365        | P._soli_SJ10.gb                      |      | non-ribosomal peptide synthetase                          | 84.35 |
| NC_007492 | NZ_CP005969        | P._syringae_pv._syringae_B301D.gb    |      | non-ribosomal peptide synthetase                          | 82.68 |
| NC_007492 | LT629761           | P._chlororaphis_DSM_21509.gb         |      | arthrofactin-type cyclic lipopeptide synthetase A         | 85.25 |
| NC_007492 | NZ_CP077074        | P._sessiliniigenes_CMR12a.gb         |      | amino acid adenylation domain-containing protein          | 81.63 |
| NC_007492 | CT573326           | P._entomophilia_L48.gb               |      | putative non-ribosomal peptide synthetase                 | 83.52 |
| NC_007492 | NZ_LT629777        | P._asplenii_ATCC_23835.gb            |      | non-ribosomal peptide synthetase                          | 84.62 |
| NC_007492 | NZ_CP007410        | P._brassicacearum_DF41.gb            |      | non-ribosomal peptide synthetase                          | 81.65 |
| NC_007492 | NZ_LT629777        | P._asplenii_ATCC_23835.gb            |      | non-ribosomal peptide synthase/polyketide synthase        | 80.81 |
| NC_007492 | NZ_CP011789        | P._putida_PC2.gb                     |      | non-ribosomal peptide synthetase                          | 82.04 |
| NC_007492 | NZ_CP005969        | P._syringae_pv._syringae_B301D.gb    | sypB | syringopeptin non-ribosomal peptide synthetase SypB       | 83.47 |
| NC_007492 | CT573326           | P._entomophilia_L48.gb               |      | putative non ribosomal peptide synthetase                 | 81.48 |
| NC_007492 | NC_007005          | P._syringae_pv._syringae_B728a.gb    |      | non-ribosomal peptide synthetase                          | 82.24 |
| NC_007492 | NC_007005          | P._syringae_pv._syringae_B728a.gb    | sypC | syringopeptin non-ribosomal peptide synthetase SypC       | 87.13 |
| NC_007492 | NZ_CP005969        | P._syringae_pv._syringae_B301D.gb    |      | non-ribosomal peptide synthase/polyketide synthase        | 82.24 |
| NC_007492 | NZ_CP009365        | P._soli_SJ10.gb                      |      | non-ribosomal peptide synthetase                          | 81.40 |
| NC_007492 | NZ_CP006256        | P._syringae_pv._syringae_HS191.gb    |      | amino acid adenylation domain-containing protein          | 80.60 |
| NC_007492 | CT573326           | P._entomophilia_L48.gb               |      | putative non-ribosomal peptide synthetase                 | 81.43 |
| NC_007492 | NZ_LT629972        | P._fuscovaginae_LMG_2158.gb          |      | amino acid adenylation domain-containing protein          | 81.32 |
| NC_007492 | CP028826           | P._fluorescens_MS82.gb               |      | non-ribosomal peptide synthetase                          | 82.91 |
| NC_007492 | NC_007005          | P._syringae_pv._syringae_B728a.gb    |      | non-ribosomal peptide synthetase                          | 84.81 |

|           |             |                                   |      |                                                               |       |
|-----------|-------------|-----------------------------------|------|---------------------------------------------------------------|-------|
| NC_007492 | NZ_CP029608 | P._kribbensis_46_2.gb             |      | amino acid adenylation domain-containing protein              | 86.00 |
| NC_007492 | NZ_LT629777 | P._asplenii_ATCC_23835.gb         |      | non-ribosomal peptide synthetase                              | 87.34 |
| NC_007492 | NZ_LT629778 | P._granadensis_LMG_27940.gb       |      | amino acid adenylation domain-containing protein              | 83.18 |
| NC_007492 | NZ_CP005969 | P._syringae_pv._syringae_B301D.gb | sypC | syringopeptin non-ribosomal peptide synthetase SypC           | 87.13 |
| NC_007492 | NZ_LT629790 | P._mediterranea_DSM_16733.gb      |      | non-ribosomal peptide synthetase                              | 85.71 |
| NC_007492 | NZ_LT629972 | P._fuscovaginae_LMG_2158.gb       |      | non-ribosomal peptide synthetase                              | 84.31 |
| NC_007492 | NZ_AP014522 | P._protegens_Cab57.gb             |      | non-ribosomal peptide synthetase                              | 82.91 |
| NC_007492 | NZ_CP020369 | P._tolaasii_2192T.gb              |      | amino acid adenylation domain-containing protein              | 80.70 |
| NC_007492 | NZ_CP020369 | P._tolaasii_2192T.gb              |      | amino acid adenylation domain-containing protein              | 80.92 |
| NC_007492 | NZ_CP029608 | P._kribbensis_46_2.gb             |      | non-ribosomal peptide synthetase                              | 83.33 |
| NC_007492 | NZ_CP007039 | P._cichorii_JBC1.gb               |      | non-ribosomal peptide synthase/polyketide synthase            | 84.89 |
| NC_007492 | NZ_CP006256 | P._syringae_pv._syringae_HS191.gb |      | non-ribosomal peptide synthase                                | 84.18 |
| NC_007492 | NC_004129   | P._protegens_Pf_5.gb              | ofaC | orfamide A non-ribosomal peptide synthetase OfaC              | 86.00 |
| NC_007492 | LT629761    | P._chlororaphis_DSM_21509.gb      |      | arthrofactin-type cyclic lipopeptide synthetase B             | 84.40 |
| NC_007492 | NC_020209   | P._poae_RE1_1_14.gb               |      | non-ribosomal peptide synthetase                              | 84.29 |
| NC_007492 | NZ_CP007410 | P._brassicacearum_DF41.gb         |      | non-ribosomal peptide synthetase                              | 86.13 |
| NC_007492 | CP024085    | P._putida_E41.gb                  |      | non-ribosomal peptide synthetase                              | 84.07 |
| NC_007492 | NZ_CP011789 | P._putida_PC2.gb                  |      | non-ribosomal peptide synthetase                              | 80.41 |
| NC_007492 | NZ_CP029608 | P._kribbensis_46_2.gb             |      | amino acid adenylation domain-containing protein              | 89.17 |
| NC_007492 | NZ_CP020369 | P._tolaasii_2192T.gb              |      | amino acid adenylation domain-containing protein              | 84.06 |
| NC_007492 | NZ_LT629778 | P._granadensis_LMG_27940.gb       |      | non-ribosomal peptide synthetase                              | 83.76 |
| NC_007492 | NZ_LT629777 | P._asplenii_ATCC_23835.gb         |      | amino acid adenylation domain-containing protein              | 82.05 |
| NC_007492 | NZ_CP005969 | P._syringae_pv._syringae_B301D.gb | sypC | syringopeptin non-ribosomal peptide synthetase SypC           | 87.13 |
| NC_007492 | NZ_CP023299 | P._mosselii_BS011.gb              |      | non-ribosomal peptide synthetase                              | 85.19 |
| NC_007492 | NZ_CP020369 | P._tolaasii_2192T.gb              |      | non-ribosomal peptide synthetase                              | 84.09 |
| NC_007492 | NZ_CM001513 | P._lactis_SS101.gb                |      | non-ribosomal peptide synthetase                              | 85.44 |
| NC_007492 | CP028826    | P._fluorescens_MS82.gb            |      | hypothetical protein                                          | 81.01 |
| NC_007492 | NZ_CP006256 | P._syringae_pv._syringae_HS191.gb |      | non-ribosomal peptide synthetase                              | 85.83 |
| NC_007492 | NZ_CP023299 | P._mosselii_BS011.gb              |      | non-ribosomal peptide synthetase                              | 82.01 |
| NC_007492 | NC_007005   | P._syringae_pv._syringae_B728a.gb |      | amino acid adenylation domain-containing protein              | 80.53 |
| NC_007492 | LT629761    | P._chlororaphis_DSM_21509.gb      |      | arthrofactin-type cyclic lipopeptide synthetase B             | 84.40 |
| NC_007492 | NZ_LT629790 | P._mediterranea_DSM_16733.gb      |      | amino acid adenylation domain-containing protein              | 85.00 |
| NC_007492 | NZ_LT629790 | P._mediterranea_DSM_16733.gb      |      | non-ribosomal peptide synthetase                              | 82.93 |
| NC_007492 | NZ_CP077074 | P._sessiliniigenes_CM12a.gb       |      | amino acid adenylation domain-containing protein              | 86.59 |
| NC_007492 | NC_021237   | P._protegens_CHA0.gb              | ofaC | orfamide A non-ribosomal peptide synthetase OfaC              | 85.00 |
| NC_007492 | NZ_CP011789 | P._putida_PC2.gb                  |      | amino acid adenylation domain-containing protein              | 83.20 |
| NC_007492 | NC_012660   | P._fluorescens_SBW25.gb           |      | non-ribosomal peptide synthetase                              | 85.00 |
| NC_007492 | NC_021237   | P._protegens_CHA0.gb              | ofaB | orfamide A non-ribosomal peptide synthetase OfaB              | 82.76 |
| NC_007492 | NZ_CP006256 | P._syringae_pv._syringae_HS191.gb | sypC | syringopeptin non-ribosomal peptide synthetase SypC           | 82.69 |
| NC_007492 | NC_004129   | P._protegens_Pf_5.gb              | ofaA | orfamide A non-ribosomal peptide synthetase OfaA              | 85.21 |
| NC_007492 | CT573326    | P._entomophila_L48.gb             |      | putative non-ribosomal peptide synthetase, terminal component | 81.19 |

|           |                    |                                      |      |                                                      |       |
|-----------|--------------------|--------------------------------------|------|------------------------------------------------------|-------|
| NC_007492 | NZ_CM001513        | P._lactis_SS101.gb                   |      | non-ribosomal peptide synthetase                     | 81.71 |
| NC_007492 | NZ_CP007039        | P._cichorii_JBC1.gb                  |      | non-ribosomal peptide synthetase                     | 86.09 |
| NC_007492 | NZ_CP007039        | P._cichorii_JBC1.gb                  |      | non-ribosomal peptide synthetase                     | 82.81 |
| NC_007492 | NZ_CP005969        | P._syringae_pv._syringae_B301D.gb    |      | amino acid adenylation domain-containing protein     | 80.09 |
| NC_007492 | NZ_LT629777        | P._asplenii_ATCC_23835.gb            |      | non-ribosomal peptide synthetase                     | 81.01 |
| NC_007492 | NZ_CP005969        | P._syringae_pv._syringae_B301D.gb    |      | non-ribosomal peptide synthetase                     | 83.54 |
| NC_007492 | CP024085           | P._putida_E41.gb                     |      | non-ribosomal peptide synthetase                     | 84.02 |
| NC_007492 | NZ_CP009365        | P._soli_SJ10.gb                      |      | non-ribosomal peptide synthetase                     | 86.31 |
| NC_007492 | NZ_CP005969        | P._syringae_pv._syringae_B301D.gb    | sypB | syringopeptin non-ribosomal peptide synthetase SypB  | 83.47 |
| NC_007492 | NZ_LT629972        | P._fuscovaginae_LMG_2158.gb          |      | non-ribosomal peptide synthetase                     | 87.34 |
| NC_007492 | NC_012660          | P._fluorescens_SBW25.gb              |      | non-ribosomal peptide synthetase                     | 80.34 |
| NC_007492 | NZ_LT629972        | P._fuscovaginae_LMG_2158.gb          |      | non-ribosomal peptide synthetase                     | 81.51 |
| NC_007492 | NZ_CP035088        | P._viciae_11K1.gb                    |      | amino acid adenylation domain-containing protein     | 81.94 |
| NC_007492 | AE016853           | P._syringae_pv._tomato_str_DC3000.gb |      | non-ribosomal peptide synthetase, terminal component | 82.89 |
| NC_007492 | NC_021237          | P._protegens_CHA0.gb                 | ofaA | orfamide A non-ribosomal peptide synthetase OfaA     | 85.80 |
| NC_007492 | NZ_JAHSTY010000001 | P._azadiae_SWRI103.gb                |      | amino acid adenylation domain-containing protein     | 85.00 |
| NC_007492 | NZ_LT629777        | P._asplenii_ATCC_23835.gb            |      | non-ribosomal peptide synthetase                     | 81.98 |
| NC_007492 | NZ_CP029608        | P._kribbensis_46_2.gb                |      | amino acid adenylation domain-containing protein     | 83.26 |
| NC_007492 | NZ_LT629972        | P._fuscovaginae_LMG_2158.gb          |      | non-ribosomal peptide synthetase                     | 82.58 |
| NC_007492 | CP027716           | P._chlororaphis_PBSt_2.gb            |      | Peptide synthetase                                   | 84.55 |
| NC_007492 | NZ_CP005969        | P._syringae_pv._syringae_B301D.gb    |      | non-ribosomal peptide synthetase                     | 82.68 |
| NC_007492 | NZ_LT629777        | P._asplenii_ATCC_23835.gb            |      | non-ribosomal peptide synthetase                     | 80.27 |
| NC_007492 | NZ_LT629972        | P._fuscovaginae_LMG_2158.gb          |      | non-ribosomal peptide synthetase                     | 85.47 |
| NC_007492 | NC_004129          | P._protegens_Pf_5.gb                 | ofaB | orfamide A non-ribosomal peptide synthetase OfaB     | 83.45 |
| NC_007492 | NC_012660          | P._fluorescens_SBW25.gb              |      | non-ribosomal peptide synthetase                     | 85.50 |
| NC_007492 | NZ_LT629972        | P._fuscovaginae_LMG_2158.gb          |      | non-ribosomal peptide synthetase/polyketide synthase | 80.30 |
| NC_007492 | NZ_CP009365        | P._soli_SJ10.gb                      |      | amino acid adenylation domain-containing protein     | 81.65 |
| NC_007492 | NZ_CP006256        | P._syringae_pv._syringae_HS191.gb    |      | non-ribosomal peptide synthetase                     | 81.58 |
| NC_007492 | NZ_CP077074        | P._sessilinigenes_CMRI12a.gb         |      | amino acid adenylation domain-containing protein     | 82.44 |
| NC_007492 | NZ_CP077074        | P._sessilinigenes_CMRI12a.gb         |      | amino acid adenylation domain-containing protein     | 86.07 |
| NC_007492 | NC_007005          | P._syringae_pv._syringae_B728a.gb    |      | non-ribosomal peptide synthetase                     | 86.79 |
| NC_007492 | NZ_CP007039        | P._cichorii_JBC1.gb                  |      | non-ribosomal peptide synthetase                     | 84.13 |
| NC_007492 | NZ_CP005969        | P._syringae_pv._syringae_B301D.gb    |      | non-ribosomal peptide synthetase/polyketide synthase | 82.24 |
| NC_007492 | CP024085           | P._putida_E41.gb                     |      | non-ribosomal peptide synthetase                     | 82.39 |
| NC_007492 | NC_020209          | P._poae_RE1_1_14.gb                  |      | non-ribosomal peptide synthetase                     | 80.43 |
| NC_007492 | CP028826           | P._fluorescens_MS82.gb               |      | non-ribosomal peptide synthetase                     | 82.28 |
| NC_007492 | NC_020209          | P._poae_RE1_1_14.gb                  |      | non-ribosomal peptide synthetase                     | 83.66 |
| NC_007492 | NZ_JAHSTY010000001 | P._azadiae_SWRI103.gb                |      | amino acid adenylation domain-containing protein     | 83.80 |
| NC_007492 | NZ_CP007039        | P._cichorii_JBC1.gb                  |      | amino acid adenylation domain-containing protein     | 85.05 |
| NC_007492 | CP028826           | P._fluorescens_MS82.gb               |      | non-ribosomal peptide synthetase                     | 81.55 |
| NC_007492 | NZ_CP020369        | P._tolaasii_2192T.gb                 |      | amino acid adenylation domain-containing protein     | 83.04 |

|           |                    |                                       |      |                                                     |       |
|-----------|--------------------|---------------------------------------|------|-----------------------------------------------------|-------|
| NC_007492 | AE016853           | P._syringae_pv._tomato_str._DC3000.gb | syfB | non-ribosomal peptide synthetase SyfB               | 85.44 |
| NC_007492 | CT573326           | P._entomophilia_L48.gb                |      | putative non-ribosomal peptide synthetase           | 86.21 |
| NC_007492 | NZ_CP006256        | P._syringae_pv._syringae_HS191.gb     |      | non-ribosomal peptide synthetase                    | 80.92 |
| NC_007492 | NC_007005          | P._syringae_pv._syringae_B728a.gb     |      | non-ribosomal peptide synthetase                    | 82.68 |
| NC_007492 | LT629761           | P._chlororaphis_DSM_21509.gb          |      | arthrofactin-type cyclic lipopeptide synthetase C   | 81.75 |
| NC_007492 | NZ_LT629972        | P._fuscovaginae_LMG_2158.gb           |      | non-ribosomal peptide synthetase                    | 85.96 |
| NC_007492 | NZ_CP077074        | P._sessiliniigenes_CM12a.gb           |      | amino acid adenylation domain-containing protein    | 80.61 |
| NC_007492 | NZ_LT629777        | P._asplenii_ATCC_23835.gb             |      | non-ribosomal peptide synthetase                    | 81.94 |
| NC_007492 | NZ_CP020369        | P._tolaasii_2192T.gb                  |      | amino acid adenylation domain-containing protein    | 85.15 |
| NC_007492 | NZ_LT629972        | P._fuscovaginae_LMG_2158.gb           |      | non-ribosomal peptide synthetase                    | 82.96 |
| NC_007492 | NZ_LT629778        | P._granadensis_LMG_27940.gb           |      | non-ribosomal peptide synthetase                    | 88.51 |
| NC_007492 | NZ_AP014522        | P._protegens_Cab57.gb                 | ofaC | orfamide A non-ribosomal peptide synthetase OfaC    | 86.00 |
| NC_007492 | CP028826           | P._fluorescens_MS82.gb                |      | non-ribosomal peptide synthetase                    | 93.46 |
| NC_007492 | NZ_CP029608        | P._kribbensis_46_2.gb                 |      | amino acid adenylation domain-containing protein    | 86.08 |
| NC_007492 | CP027716           | P._chlororaphis_PBSt_2.gb             |      | Peptide synthetase                                  | 84.41 |
| NC_007492 | NZ_LT629777        | P._asplenii_ATCC_23835.gb             |      | non-ribosomal peptide synthetase                    | 82.78 |
| NC_007492 | NZ_CP020369        | P._tolaasii_2192T.gb                  |      | amino acid adenylation domain-containing protein    | 84.30 |
| NC_007492 | NZ_JAHSTY010000001 | P._azadiae_SWRI103.gb                 |      | amino acid adenylation domain-containing protein    | 86.29 |
| NC_007492 | NZ_AP014522        | P._protegens_Cab57.gb                 | ofaB | orfamide A non-ribosomal peptide synthetase OfaB    | 82.83 |
| NC_007492 | NZ_CP035088        | P._viciae_11K1.gb                     |      | non-ribosomal peptide synthetase                    | 82.48 |
| NC_007492 | LT629761           | P._chlororaphis_DSM_21509.gb          |      | non-ribosomal peptide synthase domain               | 85.92 |
| NC_007492 | NZ_CP005969        | P._syringae_pv._syringae_B301D.gb     | sypA | syringopeptin non-ribosomal peptide synthetase SypA | 85.58 |
| NC_007492 | NZ_CP009365        | P._soli_SJ10.gb                       |      | non-ribosomal peptide synthetase                    | 83.47 |
| NC_007492 | NZ_CP005969        | P._syringae_pv._syringae_B301D.gb     |      | non-ribosomal peptide synthetase                    | 86.67 |
| NC_007492 | LT629761           | P._chlororaphis_DSM_21509.gb          |      | arthrofactin-type cyclic lipopeptide synthetase A   | 80.62 |
| NC_007492 | NZ_AP014522        | P._protegens_Cab57.gb                 | ofaA | orfamide A non-ribosomal peptide synthetase OfaA    | 86.14 |
| NC_007492 | LT629761           | P._chlororaphis_DSM_21509.gb          |      | arthrofactin-type cyclic lipopeptide synthetase C   | 85.71 |
| NC_007492 | NZ_LT629777        | P._asplenii_ATCC_23835.gb             |      | non-ribosomal peptide synthetase                    | 80.46 |
| NC_007492 | NZ_CP077074        | P._sessiliniigenes_CM12a.gb           |      | amino acid adenylation domain-containing protein    | 83.50 |
| NC_007492 | CT573326           | P._entomophilia_L48.gb                |      | putative non-ribosomal peptide synthetase           | 80.17 |
| NC_007492 | NZ_CP011789        | P._putida_PC2.gb                      |      | non-ribosomal peptide synthetase                    | 84.55 |
| NC_007492 | NZ_LT629777        | P._asplenii_ATCC_23835.gb             |      | non-ribosomal peptide synthase/polyketide synthase  | 83.47 |
| NC_007492 | NZ_CP007410        | P._brassicacearum_DF41.gb             |      | non-ribosomal peptide synthetase                    | 83.85 |
| NC_007492 | NC_020209          | P._poae_RE1_1_14.gb                   |      | non-ribosomal peptide synthetase                    | 84.76 |
| NC_007492 | CT573326           | P._entomophilia_L48.gb                |      | putative non ribosomal peptide synthetase           | 82.52 |
| NC_007492 | NZ_CP005969        | P._syringae_pv._syringae_B301D.gb     | sypB | syringopeptin non-ribosomal peptide synthetase SypB | 87.13 |
| NC_007492 | NC_007005          | P._syringae_pv._syringae_B728a.gb     | sypC | syringopeptin non-ribosomal peptide synthetase SypC | 80.95 |
| NC_007492 | NC_007005          | P._syringae_pv._syringae_B728a.gb     |      | non-ribosomal peptide synthetase                    | 81.31 |
| NC_007492 | NZ_CP035088        | P._viciae_11K1.gb                     |      | non-ribosomal peptide synthase/polyketide synthase  | 80.10 |
| NC_007492 | NZ_CP005969        | P._syringae_pv._syringae_B301D.gb     |      | non-ribosomal peptide synthetase                    | 83.19 |
| NC_007492 | NZ_CP006256        | P._syringae_pv._syringae_HS191.gb     | sypA | syringopeptin non-ribosomal peptide synthetase SypA | 84.62 |



|           |             |                                      |      |                                                           |       |
|-----------|-------------|--------------------------------------|------|-----------------------------------------------------------|-------|
| NC_007492 | NZ_CP007410 | P._brassicacearum_DF41.gb            |      | non-ribosomal peptide synthetase                          | 86.14 |
| NC_007492 | NZ_CM001513 | P._lactis_SS101.gb                   |      | non-ribosomal peptide synthetase                          | 82.52 |
| NC_007492 | NZ_CP006256 | P._syringae_pv._syringae_HS191.gb    |      | non-ribosomal peptide synthase/polyketide synthase        | 84.62 |
| NC_007492 | NZ_CP020369 | P._tolaasii_2192T.gb                 |      | non-ribosomal peptide synthetase                          | 80.20 |
| NC_007492 | LT629761    | P._chlororaphis_DSM_21509.gb         |      | arthrofactin-type cyclic lipopeptide synthetase A         | 80.62 |
| NC_007492 | NZ_LT629972 | P._fuscovaginae_LMG_2158.gb          |      | non-ribosomal peptide synthetase                          | 85.09 |
| NC_007492 | AE016853    | P._syringae_pv._tomato_str_DC3000.gb | syfA | non-ribosomal peptide synthetase SyfA                     | 80.69 |
| NC_007492 | NZ_LT629972 | P._fuscovaginae_LMG_2158.gb          |      | non-ribosomal peptide synthetase                          | 82.14 |
| NC_007492 | NC_007005   | P._syringae_pv._syringae_B728a.gb    | sypB | syringopeptin non-ribosomal peptide synthetase SypB       | 82.76 |
| NC_007492 | NZ_CP020369 | P._tolaasii_2192T.gb                 |      | amino acid adenylation domain-containing protein          | 85.50 |
| NC_007492 | NZ_CP020369 | P._tolaasii_2192T.gb                 |      | phosphopantetheine-binding protein                        | 84.00 |
| NC_007492 | NZ_CP005969 | P._syringae_pv._syringae_B301D.gb    | sypA | syringopeptin non-ribosomal peptide synthetase SypA       | 85.58 |
| NC_007492 | NZ_CP023299 | P._mosselii_BS011.gb                 |      | amino acid adenylation domain-containing protein          | 81.56 |
| NC_007492 | CP027716    | P._chlororaphis_PBSt_2.gb            |      | Siderophore biosynthesis non-ribosomal peptide synthetase | 84.21 |
| NC_007492 | NC_007005   | P._syringae_pv._syringae_B728a.gb    | sypA | syringopeptin non-ribosomal peptide synthetase SypA       | 84.68 |
| NC_007492 | NZ_CP005969 | P._syringae_pv._syringae_B301D.gb    |      | amino acid adenylation domain-containing protein          | 83.78 |
| NC_007492 | NZ_CP020369 | P._tolaasii_2192T.gb                 |      | amino acid adenylation domain-containing protein          | 82.26 |
| NC_007492 | NZ_CP007039 | P._cichorii_JBC1.gb                  |      | non-ribosomal peptide synthase/polyketide synthase        | 84.86 |
| NC_007492 | NZ_CP006256 | P._syringae_pv._syringae_HS191.gb    |      | non-ribosomal peptide synthase                            | 82.22 |
| NC_007492 | LT629761    | P._chlororaphis_DSM_21509.gb         |      | non-ribosomal peptide synthase domain                     | 85.92 |
| NC_007492 | NZ_CP029608 | P._kribbensis_46_2.gb                |      | non-ribosomal peptide synthetase                          | 88.94 |
| NC_007492 | NC_020209   | P._poae_RE1_1_14.gb                  |      | non-ribosomal peptide synthetase                          | 83.52 |
| NC_007492 | NZ_CP007410 | P._brassicacearum_DF41.gb            |      | non-ribosomal peptide synthetase                          | 82.67 |
| NC_007492 | LT629761    | P._chlororaphis_DSM_21509.gb         |      | arthrofactin-type cyclic lipopeptide synthetase B         | 85.34 |
| NC_007492 | NC_004129   | P._protegens_Pf_5.gb                 | ofaC | orfamide A non-ribosomal peptide synthetase OfaC          | 80.00 |
| NC_007492 | NZ_CP011789 | P._putida_PC2.gb                     |      | non-ribosomal peptide synthetase                          | 82.76 |
| NC_007492 | NZ_CP029608 | P._kribbensis_46_2.gb                |      | amino acid adenylation domain-containing protein          | 82.76 |
| NC_007492 | CP024085    | P._putida_E41.gb                     |      | non-ribosomal peptide synthetase                          | 84.82 |
| NC_007492 | NZ_CP020369 | P._tolaasii_2192T.gb                 |      | amino acid adenylation domain-containing protein          | 80.21 |
| NC_007492 | NZ_LT629777 | P._asplenii_ATCC_23835.gb            |      | amino acid adenylation domain-containing protein          | 80.60 |
| NC_007492 | NZ_LT629778 | P._granadensis_LMG_27940.gb          |      | non-ribosomal peptide synthetase                          | 86.01 |
| NC_007492 | NZ_LT629778 | P._granadensis_LMG_27940.gb          |      | non-ribosomal peptide synthetase                          | 84.91 |
| NC_007492 | NZ_CP005969 | P._syringae_pv._syringae_B301D.gb    | sypC | syringopeptin non-ribosomal peptide synthetase SypC       | 81.99 |
| NC_007492 | NZ_CP023299 | P._mosselii_BS011.gb                 |      | non-ribosomal peptide synthetase                          | 87.85 |
| NC_007492 | NZ_CP005969 | P._syringae_pv._syringae_B301D.gb    |      | non-ribosomal peptide synthase/polyketide synthase        | 80.20 |
| NC_007492 | NZ_CP009365 | P._soli_SJ10.gb                      |      | non-ribosomal peptide synthetase                          | 82.76 |
| NC_007492 | NZ_CP006256 | P._syringae_pv._syringae_HS191.gb    |      | amino acid adenylation domain-containing protein          | 84.68 |
| NC_007492 | NZ_LT629972 | P._fuscovaginae_LMG_2158.gb          |      | amino acid adenylation domain-containing protein          | 80.41 |
| NC_007492 | NZ_CP009365 | P._soli_SJ10.gb                      |      | non-ribosomal peptide synthetase                          | 83.19 |
| NC_007492 | CP028826    | P._fluorescens_MS82.gb               |      | non-ribosomal peptide synthetase                          | 81.43 |
| NC_007492 | NC_007005   | P._syringae_pv._syringae_B728a.gb    |      | non-ribosomal peptide synthetase                          | 83.19 |



|           |             |                                      |      |                                                               |       |
|-----------|-------------|--------------------------------------|------|---------------------------------------------------------------|-------|
| NC_007492 | CT573326    | P_entomophilia_L48.gb                |      | putative pyoverdine sidechain peptide synthetase              | 86.27 |
| NC_007492 | NZ_LT629790 | P_mediterranea_DSM_16733.gb          |      | non-ribosomal peptide synthetase                              | 80.03 |
| NC_007492 | NZ_CP005969 | P_syringae_pv._syringae_B301D.gb     | sypC | syringopeptin non-ribosomal peptide synthetase SypC           | 81.99 |
| NC_007492 | NZ_LT629778 | P_granadensis_LMG_27940.gb           |      | amino acid adenylation domain-containing protein              | 80.77 |
| NC_007492 | NZ_CP029608 | P_kribbensis_46_2.gb                 |      | amino acid adenylation domain-containing protein              | 91.23 |
| NC_007492 | NZ_CP020369 | P_tolaasii_2192T.gb                  |      | amino acid adenylation domain-containing protein              | 80.62 |
| NC_007492 | NZ_CP020369 | P_tolaasii_2192T.gb                  |      | amino acid adenylation domain-containing protein              | 83.33 |
| NC_007492 | NZ_CP007039 | P_cichorii_JBC1.gb                   |      | non-ribosomal peptide synthetase                              | 84.67 |
| NC_007492 | NZ_CP007039 | P_cichorii_JBC1.gb                   |      | non-ribosomal peptide synthetase                              | 82.63 |
| NC_007492 | NZ_CP077074 | P_sessiliniigenes_CM12a.gb           |      | amino acid adenylation domain-containing protein              | 82.68 |
| NC_007492 | NZ_CM001513 | P_lactis_SS101.gb                    |      | non-ribosomal peptide synthetase                              | 86.57 |
| NC_007492 | NZ_CP005969 | P_syringae_pv._syringae_B301D.gb     |      | amino acid adenylation domain-containing protein              | 83.78 |
| NC_007492 | NZ_CP005969 | P_syringae_pv._syringae_B301D.gb     |      | non-ribosomal peptide synthetase                              | 83.19 |
| NC_007492 | NZ_LT629777 | P_asplenii_ATCC_23835.gb             |      | non-ribosomal peptide synthetase                              | 81.03 |
| NC_007492 | NZ_CP009365 | P_soli_SJ10.gb                       |      | non-ribosomal peptide synthetase                              | 81.34 |
| NC_007492 | NZ_CP005969 | P_syringae_pv._syringae_B301D.gb     | sypB | syringopeptin non-ribosomal peptide synthetase SypB           | 87.13 |
| NC_007492 | AE016853    | P_syringae_pv._tomato_str._DC3000.gb |      | non-ribosomal peptide synthetase, terminal component          | 82.69 |
| NC_007492 | NZ_LT629972 | P_fuscovaginae_LMG_2158.gb           |      | non-ribosomal peptide synthetase                              | 81.43 |
| NC_007492 | NZ_CP035088 | P_viciae_11K1.gb                     |      | amino acid adenylation domain-containing protein              | 85.71 |
| NC_007492 | NC_012660   | P_fluorescens_SBW25.gb               |      | non-ribosomal peptide synthetase                              | 85.15 |
| NC_007492 | NC_021237   | P_protegens_CHA0.gb                  | ofaA | orfamide A non-ribosomal peptide synthetase OfaA              | 86.14 |
| NC_007492 | NZ_CP020369 | P_tolaasii_2192T.gb                  |      | non-ribosomal peptide synthetase                              | 85.86 |
| NC_007492 | NZ_CM001513 | P_lactis_SS101.gb                    |      | non-ribosomal peptide synthetase                              | 81.63 |
| NC_007492 | NZ_CP006256 | P_syringae_pv._syringae_HS191.gb     |      | non-ribosomal peptide synthetase                              | 80.39 |
| NC_007492 | NZ_CP023299 | P_mosselii_BS011.gb                  |      | non-ribosomal peptide synthetase                              | 83.14 |
| NC_007492 | NC_007005   | P_syringae_pv._syringae_B728a.gb     |      | amino acid adenylation domain-containing protein              | 83.78 |
| NC_007492 | CP028826    | P_fluorescens_MS82.gb                |      | hypothetical protein                                          | 83.74 |
| NC_007492 | NZ_CP035088 | P_viciae_11K1.gb                     |      | amino acid adenylation domain-containing protein              | 86.11 |
| NC_007492 | NZ_LT629790 | P_mediterranea_DSM_16733.gb          |      | amino acid adenylation domain-containing protein              | 84.44 |
| NC_007492 | NZ_LT629790 | P_mediterranea_DSM_16733.gb          |      | non-ribosomal peptide synthetase                              | 81.09 |
| NC_007492 | NZ_CP007410 | P_brassicacearum_DF41.gb             |      | non-ribosomal peptide synthetase                              | 80.32 |
| NC_007492 | NZ_CP077074 | P_sessiliniigenes_CM12a.gb           |      | amino acid adenylation domain-containing protein              | 80.10 |
| NC_007492 | LT629761    | P_chlororaphis_DSM_21509.gb          |      | arthrofactin-type cyclic lipopeptide synthetase B             | 85.34 |
| NC_007492 | NZ_CP077074 | P_sessiliniigenes_CM12a.gb           |      | non-ribosomal peptide synthetase                              | 83.33 |
| NC_007492 | NZ_CP011789 | P_putida_PC2.gb                      |      | amino acid adenylation domain-containing protein              | 80.37 |
| NC_007492 | NC_021237   | P_protegens_CHA0.gb                  | ofaC | orfamide A non-ribosomal peptide synthetase OfaC              | 80.36 |
| NC_007492 | CP027716    | P_chlororaphis_PBSt_2.gb             |      | Non-ribosomal peptide synthetase                              | 84.06 |
| NC_007492 | NZ_CP006256 | P_syringae_pv._syringae_HS191.gb     | sypC | syringopeptin non-ribosomal peptide synthetase SypC           | 86.14 |
| NC_007492 | NC_021237   | P_protegens_CHA0.gb                  | ofaB | orfamide A non-ribosomal peptide synthetase OfaB              | 83.33 |
| NC_007492 | NC_012660   | P_fluorescens_SBW25.gb               |      | non-ribosomal peptide synthetase                              | 85.07 |
| NC_007492 | CT573326    | P_entomophilia_L48.gb                |      | putative non-ribosomal peptide synthetase, terminal component | 81.14 |

|           |                    |                                       |      |                                                    |       |
|-----------|--------------------|---------------------------------------|------|----------------------------------------------------|-------|
| NC_007492 | NC_004129          | P._protegens_Pf_5.gb                  | ofaA | orfamide A non-ribosomal peptide synthetase OfaA   | 85.15 |
| NC_007492 | NZ_JAHSTY010000001 | P._azadiae_SWRI103.gb                 |      | amino acid adenylation domain-containing protein   | 84.40 |
| NC_007492 | NC_020209          | P._poae_RE1_1_14.gb                   |      | non-ribosomal peptide synthetase                   | 81.03 |
| NC_007492 | NC_020209          | P._poae_RE1_1_14.gb                   |      | non-ribosomal peptide synthetase                   | 81.40 |
| NC_007492 | NZ_CP020369        | P._tolaasii_2192T.gb                  |      | amino acid adenylation domain-containing protein   | 86.00 |
| NC_007492 | NZ_CP077074        | P._sessilinigenes_CMR12a.gb           |      | amino acid adenylation domain-containing protein   | 80.90 |
| NC_007492 | CP028826           | P._fluorescens_MS82.gb                |      | non-ribosomal peptide synthetase                   | 81.00 |
| NC_007492 | NZ_CP007039        | P._cichorii_JBC1.gb                   |      | amino acid adenylation domain-containing protein   | 83.94 |
| NC_007492 | NZ_LT629972        | P._fuscovaginae_LMG_2158.gb           |      | non-ribosomal peptide synthetase                   | 85.98 |
| NC_007492 | AE016853           | P._syringae_pv._tomato_str._DC3000.gb | syfB | non-ribosomal peptide synthetase SyfB              | 82.05 |
| NC_007492 | NC_007005          | P._syringae_pv._syringae_B728a.gb     |      | non-ribosomal peptide synthetase                   | 86.67 |
| NC_007492 | NZ_LT629972        | P._fuscovaginae_LMG_2158.gb           |      | non-ribosomal peptide synthetase                   | 84.96 |
| NC_007492 | NC_020209          | P._poae_RE1_1_14.gb                   |      | non-ribosomal peptide synthetase                   | 81.25 |
| NC_007492 | LT629761           | P._chlororaphis_DSM_21509.gb          |      | arthrofactin-type cyclic lipopeptide synthetase C  | 85.71 |
| NC_007492 | CT573326           | P._entomophilia_L48.gb                |      | putative non-ribosomal peptide synthetase          | 84.87 |
| NC_007492 | NZ_CP077074        | P._sessilinigenes_CMR12a.gb           |      | amino acid adenylation domain-containing protein   | 83.92 |
| NC_007492 | NZ_LT629972        | P._fuscovaginae_LMG_2158.gb           |      | non-ribosomal peptide synthetase                   | 80.60 |
| NC_007492 | NZ_CP020369        | P._tolaasii_2192T.gb                  |      | amino acid adenylation domain-containing protein   | 82.05 |
| NC_007492 | NZ_CP020369        | P._tolaasii_2192T.gb                  |      | AMP-binding protein                                | 87.23 |
| NC_007492 | NZ_LT629777        | P._asplenii_ATCC_23835.gb             |      | non-ribosomal peptide synthetase                   | 81.75 |
| NC_007492 | NZ_CP029608        | P._kribbensis_46_2.gb                 |      | amino acid adenylation domain-containing protein   | 82.01 |
| NC_007492 | CP028826           | P._fluorescens_MS82.gb                |      | non-ribosomal peptide synthetase                   | 80.09 |
| NC_007492 | NZ_AP014522        | P._protegens_Cab57.gb                 | ofaC | orfamide A non-ribosomal peptide synthetase OfaC   | 81.09 |
| NC_007492 | NZ_LT629778        | P._granadensis_LMG_27940.gb           |      | non-ribosomal peptide synthetase                   | 82.91 |
| NC_007492 | CP027716           | P._chlororaphis_PBSt_2.gb             |      | Peptide synthetase                                 | 81.60 |
| NC_007492 | NZ_LT629777        | P._asplenii_ATCC_23835.gb             |      | non-ribosomal peptide synthetase                   | 85.34 |
| NC_007492 | NZ_JAHSTY010000001 | P._azadiae_SWRI103.gb                 |      | amino acid adenylation domain-containing protein   | 80.31 |
| NC_007492 | CP027716           | P._chlororaphis_PBSt_2.gb             |      | Peptide synthetase                                 | 80.13 |
| NC_007492 | NZ_LT629972        | P._fuscovaginae_LMG_2158.gb           |      | non-ribosomal peptide synthetase                   | 82.48 |
| NC_007492 | NZ_LT629790        | P._mediterranea_DSM_16733.gb          |      | non-ribosomal peptide synthetase                   | 80.10 |
| NC_007492 | NZ_LT629972        | P._fuscovaginae_LMG_2158.gb           |      | non-ribosomal peptide synthetase                   | 80.46 |
| NC_007492 | NC_004129          | P._protegens_Pf_5.gb                  | ofaB | orfamide A non-ribosomal peptide synthetase OfaB   | 83.33 |
| NC_007492 | NZ_LT629777        | P._asplenii_ATCC_23835.gb             |      | non-ribosomal peptide synthetase                   | 84.21 |
| NC_007492 | NZ_CP005969        | P._syringae_pv._syringae_B301D.gb     |      | non-ribosomal peptide synthetase                   | 86.67 |
| NC_007492 | NZ_LT629972        | P._fuscovaginae_LMG_2158.gb           |      | non-ribosomal peptide synthetase                   | 82.40 |
| NC_007492 | NZ_CP009365        | P._soli_SJ10.gb                       |      | amino acid adenylation domain-containing protein   | 85.44 |
| NC_007492 | NZ_LT629972        | P._fuscovaginae_LMG_2158.gb           |      | non-ribosomal peptide synthase/polyketide synthase | 88.60 |
| NC_007492 | NC_012660          | P._fluorescens_SBW25.gb               |      | non-ribosomal peptide synthetase                   | 84.43 |
| NC_007492 | NZ_CP077074        | P._sessilinigenes_CMR12a.gb           |      | amino acid adenylation domain-containing protein   | 83.65 |
| NC_007492 | NZ_CP007039        | P._cichorii_JBC1.gb                   |      | non-ribosomal peptide synthetase                   | 86.06 |
| NC_007492 | NZ_CP077074        | P._sessilinigenes_CMR12a.gb           |      | amino acid adenylation domain-containing protein   | 83.95 |

|           |                    |                                    |      |                                                    |       |
|-----------|--------------------|------------------------------------|------|----------------------------------------------------|-------|
| NC_007492 | CP024085           | P_putida_E41.gb                    |      | non-ribosomal peptide synthetase                   | 83.62 |
| NC_007492 | NZ_CP005969        | P_syringae_pv_syringae_B301D.gb    |      | non-ribosomal peptide synthase/polyketide synthase | 80.20 |
| NC_007492 | NZ_LT629777        | P_asplenii_ATCC_23835.gb           |      | non-ribosomal peptide synthetase                   | 82.58 |
| NC_007492 | NZ_CP077074        | P_sessilinigenes_CMR12a.gb         |      | amino acid adenylation domain-containing protein   | 88.04 |
| NC_007492 | NZ_CP007039        | P_cichorii_JBC1.gb                 |      | non-ribosomal peptide synthetase                   | 84.38 |
| NC_007492 | NZ_CP077074        | P_sessilinigenes_CMR12a.gb         |      | amino acid adenylation domain-containing protein   | 85.46 |
| NC_007492 | NZ_CP005969        | P_syringae_pv_syringae_B301D.gb    |      | non-ribosomal peptide synthase/polyketide synthase | 80.30 |
| NC_007492 | CP024085           | P_putida_E41.gb                    |      | non-ribosomal peptide synthetase                   | 81.15 |
| NC_007492 | NZ_CP009365        | P_soli_SJ10.gb                     |      | amino acid adenylation domain-containing protein   | 80.30 |
| NC_007492 | NC_012660          | P_fluorescens_SBW25.gb             |      | non-ribosomal peptide synthetase                   | 82.62 |
| NC_007492 | NZ_LT629972        | P_fuscovaginae_LMG_2158.gb         |      | non-ribosomal peptide synthase/polyketide synthase | 80.49 |
| NC_007492 | NZ_CP006256        | P_syringae_pv_syringae_HS191.gb    |      | non-ribosomal peptide synthetase                   | 80.36 |
| NC_007492 | NZ_CM001513        | P_lactis_SS101.gb                  |      | non-ribosomal peptide synthetase                   | 85.71 |
| NC_007492 | NZ_LT629777        | P_asplenii_ATCC_23835.gb           |      | non-ribosomal peptide synthetase                   | 85.09 |
| NC_007492 | NC_004129          | P_protegens_Pf_5.gb                | ofaB | orfamide A non-ribosomal peptide synthetase OfaB   | 81.76 |
| NC_007492 | NZ_LT629972        | P_fuscovaginae_LMG_2158.gb         |      | non-ribosomal peptide synthetase                   | 80.46 |
| NC_007492 | NZ_CP005969        | P_syringae_pv_syringae_B301D.gb    |      | non-ribosomal peptide synthetase                   | 85.09 |
| NC_007492 | NZ_JAHSTY010000001 | P_azadiae_SWRI103.gb               |      | amino acid adenylation domain-containing protein   | 85.15 |
| NC_007492 | NZ_LT629777        | P_asplenii_ATCC_23835.gb           |      | non-ribosomal peptide synthetase                   | 83.49 |
| NC_007492 | NZ_LT629790        | P_mediterranea_DSM_16733.gb        |      | non-ribosomal peptide synthetase                   | 87.13 |
| NC_007492 | CP027716           | P_chlororaphis_PBST_2.gb           |      | Peptide synthetase                                 | 86.07 |
| NC_007492 | NZ_AP014522        | P_protegens_Cab57.gb               | ofaC | orfamide A non-ribosomal peptide synthetase OfaC   | 83.19 |
| NC_007492 | CP028826           | P_fluorescens_MS82.gb              |      | non-ribosomal peptide synthetase                   | 80.97 |
| NC_007492 | NZ_LT629778        | P_granadensis_LMG_27940.gb         |      | non-ribosomal peptide synthetase                   | 82.35 |
| NC_007492 | CP027716           | P_chlororaphis_PBST_2.gb           |      | Peptide synthetase                                 | 84.40 |
| NC_007492 | NZ_CP077074        | P_sessilinigenes_CMR12a.gb         |      | amino acid adenylation domain-containing protein   | 83.33 |
| NC_007492 | NZ_CP020369        | P_tolaasii_2192T.gb                |      | amino acid adenylation domain-containing protein   | 80.46 |
| NC_007492 | NZ_LT629972        | P_fuscovaginae_LMG_2158.gb         |      | non-ribosomal peptide synthetase                   | 83.42 |
| NC_007492 | NZ_CP020369        | P_tolaasii_2192T.gb                |      | AMP-binding protein                                | 87.08 |
| NC_007492 | AE016853           | P_syringae_pv_tomato_str_DC3000.gb | syfB | non-ribosomal peptide synthetase SyfB              | 80.77 |
| NC_007492 | NC_007005          | P_syringae_pv_syringae_B728a.gb    |      | non-ribosomal peptide synthetase                   | 80.74 |
| NC_007492 | NZ_LT629972        | P_fuscovaginae_LMG_2158.gb         |      | non-ribosomal peptide synthetase                   | 84.96 |
| NC_007492 | LT629761           | P_chlororaphis_DSM_21509.gb        |      | arthrofactin-type cyclic lipopeptide synthetase C  | 81.88 |
| NC_007492 | NZ_JAHSTY010000001 | P_azadiae_SWRI103.gb               |      | amino acid adenylation domain-containing protein   | 81.59 |
| NC_007492 | NC_020209          | P_poea_RE1_1_14.gb                 |      | non-ribosomal peptide synthetase                   | 84.09 |
| NC_007492 | NC_020209          | P_poea_RE1_1_14.gb                 |      | non-ribosomal peptide synthetase                   | 82.15 |
| NC_007492 | NZ_CP077074        | P_sessilinigenes_CMR12a.gb         |      | amino acid adenylation domain-containing protein   | 82.98 |
| NC_007492 | NZ_CP020369        | P_tolaasii_2192T.gb                |      | amino acid adenylation domain-containing protein   | 87.08 |
| NC_007492 | NZ_LT629972        | P_fuscovaginae_LMG_2158.gb         |      | non-ribosomal peptide synthetase                   | 85.98 |
| NC_007492 | NZ_CP007039        | P_cichorii_JBC1.gb                 |      | amino acid adenylation domain-containing protein   | 82.63 |
| NC_007492 | CP028826           | P_fluorescens_MS82.gb              |      | non-ribosomal peptide synthetase                   | 85.58 |

|           |             |                                      |      |                                                               |       |
|-----------|-------------|--------------------------------------|------|---------------------------------------------------------------|-------|
| NC_007492 | CT573326    | P_entomophilia_L48.gb                |      | putative non-ribosomal peptide synthetase, terminal component | 82.98 |
| NC_007492 | NC_004129   | P_protegens_Pf_5.gb                  | ofaA | orfamide A non-ribosomal peptide synthetase OfaA              | 84.58 |
| NC_007492 | NZ_CP077074 | P_sessilinigenes_CM12a.gb            |      | non-ribosomal peptide synthetase                              | 83.33 |
| NC_007492 | NC_021237   | P_protegens_CHA0.gb                  | ofaC | orfamide A non-ribosomal peptide synthetase OfaC              | 80.00 |
| NC_007492 | NZ_CP011789 | P_putida_PC2.gb                      |      | amino acid adenylation domain-containing protein              | 82.43 |
| NC_007492 | NZ_CP006256 | P_syringae_pv._syringae_HS191.gb     | sypC | syringopeptin non-ribosomal peptide synthetase SypC           | 86.34 |
| NC_007492 | CP027716    | P_chlororaphis_PBST_2.gb             |      | Non-ribosomal peptide synthetase                              | 84.06 |
| NC_007492 | NC_012660   | P_fluorescens_SBW25.gb               |      | non-ribosomal peptide synthetase                              | 83.25 |
| NC_007492 | NC_021237   | P_protegens_CHA0.gb                  | ofaB | orfamide A non-ribosomal peptide synthetase OfaB              | 81.56 |
| NC_007492 | LT629761    | P_chlororaphis_DSM_21509.gb          |      | arthrofactin-type cyclic lipopeptide synthetase B             | 86.15 |
| NC_007492 | NZ_LT629790 | P_mediterranea_DSM_16733.gb          |      | amino acid adenylation domain-containing protein              | 86.12 |
| NC_007492 | NZ_CP007410 | P_brassicacearum_DF41.gb             |      | non-ribosomal peptide synthetase                              | 80.63 |
| NC_007492 | NZ_LT629790 | P_mediterranea_DSM_16733.gb          |      | non-ribosomal peptide synthetase                              | 85.05 |
| NC_007492 | NZ_CP077074 | P_sessilinigenes_CM12a.gb            |      | amino acid adenylation domain-containing protein              | 81.46 |
| NC_007492 | NZ_CM001513 | P_lactis_SS101.gb                    |      | non-ribosomal peptide synthetase                              | 81.95 |
| NC_007492 | NZ_CP020369 | P_tolaasii_2192T.gb                  |      | non-ribosomal peptide synthetase                              | 82.10 |
| NC_007492 | NZ_CP023299 | P_mosselii_BS011.gb                  |      | non-ribosomal peptide synthetase                              | 86.98 |
| NC_007492 | NC_007005   | P_syringae_pv._syringae_B728a.gb     |      | amino acid adenylation domain-containing protein              | 83.81 |
| NC_007492 | NZ_CP006256 | P_syringae_pv._syringae_HS191.gb     |      | non-ribosomal peptide synthetase                              | 83.21 |
| NC_007492 | CP028826    | P_fluorescens_MS82.gb                |      | hypothetical protein                                          | 92.14 |
| NC_007492 | NC_021237   | P_protegens_CHA0.gb                  | ofaA | orfamide A non-ribosomal peptide synthetase OfaA              | 84.11 |
| NC_007492 | NZ_CP005969 | P_syringae_pv._syringae_B301D.gb     | sypB | syringopeptin non-ribosomal peptide synthetase SypB           | 83.72 |
| NC_007492 | NZ_CP009365 | P_soli_SJ10.gb                       |      | non-ribosomal peptide synthetase                              | 81.25 |
| NC_007492 | CP024085    | P_putida_E41.gb                      |      | non-ribosomal peptide synthetase                              | 84.74 |
| NC_007492 | NZ_LT629972 | P_fuscovaginae_LMG_2158.gb           |      | non-ribosomal peptide synthetase                              | 84.48 |
| NC_007492 | NZ_CP035088 | P_viciae_11K1.gb                     |      | amino acid adenylation domain-containing protein              | 83.60 |
| NC_007492 | AE016853    | P_syringae_pv._tomato_str._DC3000.gb |      | non-ribosomal peptide synthetase, terminal component          | 82.69 |
| NC_007492 | NC_012660   | P_fluorescens_SBW25.gb               |      | non-ribosomal peptide synthetase                              | 82.46 |
| NC_007492 | NZ_CP005969 | P_syringae_pv._syringae_B301D.gb     |      | amino acid adenylation domain-containing protein              | 83.81 |
| NC_007492 | NZ_LT629777 | P_asplenii_ATCC_23835.gb             |      | non-ribosomal peptide synthetase                              | 82.90 |
| NC_007492 | NZ_CP005969 | P_syringae_pv._syringae_B301D.gb     |      | non-ribosomal peptide synthetase                              | 80.71 |
| NC_007492 | NZ_CP007039 | P_cichorii_JBC1.gb                   |      | non-ribosomal peptide synthetase                              | 85.34 |
| NC_007492 | NZ_CP007039 | P_cichorii_JBC1.gb                   |      | non-ribosomal peptide synthetase                              | 84.38 |
| NC_007492 | NZ_CM001513 | P_lactis_SS101.gb                    |      | non-ribosomal peptide synthetase                              | 83.77 |
| NC_007492 | NZ_LT629778 | P_granadensis_LMG_27940.gb           |      | amino acid adenylation domain-containing protein              | 83.26 |
| NC_007492 | NZ_CP005969 | P_syringae_pv._syringae_B301D.gb     | sypC | syringopeptin non-ribosomal peptide synthetase SypC           | 84.54 |
| NC_007492 | NZ_LT629790 | P_mediterranea_DSM_16733.gb          |      | non-ribosomal peptide synthetase                              | 81.99 |
| NC_007492 | NZ_CP029608 | P_kribbensis_46_2.gb                 |      | amino acid adenylation domain-containing protein              | 87.95 |
| NC_007492 | NZ_CP020369 | P_tolaasii_2192T.gb                  |      | amino acid adenylation domain-containing protein              | 85.64 |
| NC_007492 | NZ_CP020369 | P_tolaasii_2192T.gb                  |      | amino acid adenylation domain-containing protein              | 83.67 |
| NC_007492 | NC_007005   | P_syringae_pv._syringae_B728a.gb     |      | non-ribosomal peptide synthetase                              | 80.71 |

|           |             |                                     |      |                                                           |       |
|-----------|-------------|-------------------------------------|------|-----------------------------------------------------------|-------|
| NC_007492 | CT573326    | P_entomophilia_L48.gb               |      | putative pyoverdine sidechain peptide synthetase          | 86.27 |
| NC_007492 | NZ_LT629972 | P_fuscovaginae_LMG_2158.gb          |      | amino acid adenylation domain-containing protein          | 83.13 |
| NC_007492 | NZ_LT629790 | P_mediterranea_DSM_16733.gb         |      | non-ribosomal peptide synthetase                          | 84.16 |
| NC_007492 | NZ_CP005969 | P_syringae_pv._syringae_B301D.gb    |      | non-ribosomal peptide synthase/polyketide synthase        | 80.30 |
| NC_007492 | NZ_CP009365 | P_soli_SJ10.gb                      |      | non-ribosomal peptide synthetase                          | 85.95 |
| NC_007492 | NZ_CP006256 | P_syringae_pv._syringae_HS191.gb    |      | amino acid adenylation domain-containing protein          | 82.38 |
| NC_007492 | NZ_LT629778 | P_granadensis_LMG_27940.gb          |      | non-ribosomal peptide synthetase                          | 83.76 |
| NC_007492 | NZ_LT629777 | P_asplenii_ATCC_23835.gb            |      | amino acid adenylation domain-containing protein          | 82.18 |
| NC_007492 | NZ_LT629778 | P_granadensis_LMG_27940.gb          |      | non-ribosomal peptide synthetase                          | 84.91 |
| NC_007492 | NZ_CP005969 | P_syringae_pv._syringae_B301D.gb    | sypC | syringopeptin non-ribosomal peptide synthetase SypC       | 84.54 |
| NC_007492 | NZ_CP023299 | P_mosselii_BS011.gb                 |      | non-ribosomal peptide synthetase                          | 84.96 |
| NC_007492 | NZ_CP029608 | P_kribbensis_46_2.gb                |      | amino acid adenylation domain-containing protein          | 85.15 |
| NC_007492 | NZ_CP011789 | P_putida_PC2.gb                     |      | non-ribosomal peptide synthetase                          | 81.31 |
| NC_007492 | CP024085    | P_putida_E41.gb                     |      | non-ribosomal peptide synthetase                          | 84.82 |
| NC_007492 | NZ_CP020369 | P_tolaasii_2192T.gb                 |      | amino acid adenylation domain-containing protein          | 80.55 |
| NC_007492 | NZ_CP007410 | P_brassicacearum_DF41.gb            |      | amino acid adenylation domain-containing protein          | 80.73 |
| NC_007492 | LT629761    | P_chlororaphis_DSM_21509.gb         |      | non-ribosomal peptide synthase domain                     | 85.92 |
| NC_007492 | NZ_CP006256 | P_syringae_pv._syringae_HS191.gb    |      | non-ribosomal peptide synthase                            | 80.71 |
| NC_007492 | NZ_CP007039 | P_cichorii_JBC1.gb                  |      | non-ribosomal peptide synthase/polyketide synthase        | 83.59 |
| NC_007492 | NZ_CP029608 | P_kribbensis_46_2.gb                |      | non-ribosomal peptide synthetase                          | 90.17 |
| NC_007492 | LT629761    | P_chlororaphis_DSM_21509.gb         |      | arthrofactin-type cyclic lipopeptide synthetase B         | 86.15 |
| NC_007492 | NC_020209   | P_poaE_RE1_1_14.gb                  |      | non-ribosomal peptide synthetase                          | 82.18 |
| NC_007492 | NZ_CP007410 | P_brassicacearum_DF41.gb            |      | non-ribosomal peptide synthetase                          | 86.96 |
| NC_007492 | NC_004129   | P_protegens_Pf_5.gb                 | ofaC | orfamide A non-ribosomal peptide synthetase OfaC          | 83.67 |
| NC_007492 | NZ_CP005969 | P_syringae_pv._syringae_B301D.gb    | sypA | syringopeptin non-ribosomal peptide synthetase SypA       | 85.05 |
| NC_007492 | CP027716    | P_chlororaphis_PBST_2.gb            |      | Siderophore biosynthesis non-ribosomal peptide synthetase | 81.29 |
| NC_007492 | NZ_CP023299 | P_mosselii_BS011.gb                 |      | amino acid adenylation domain-containing protein          | 85.09 |
| NC_007492 | NC_007005   | P_syringae_pv._syringae_B728a.gb    | sypA | syringopeptin non-ribosomal peptide synthetase SypA       | 87.50 |
| NC_007492 | NZ_CP005969 | P_syringae_pv._syringae_B301D.gb    |      | amino acid adenylation domain-containing protein          | 83.81 |
| NC_007492 | NC_007005   | P_syringae_pv._syringae_B728a.gb    | sypB | syringopeptin non-ribosomal peptide synthetase SypB       | 87.79 |
| NC_007492 | NZ_CP020369 | P_tolaasii_2192T.gb                 |      | amino acid adenylation domain-containing protein          | 81.43 |
| NC_007492 | NZ_CP006256 | P_syringae_pv._syringae_HS191.gb    | sypA | syringopeptin non-ribosomal peptide synthetase SypA       | 84.86 |
| NC_007492 | NZ_CP007410 | P_brassicacearum_DF41.gb            |      | non-ribosomal peptide synthetase                          | 80.99 |
| NC_007492 | NZ_CP006256 | P_syringae_pv._syringae_HS191.gb    |      | non-ribosomal peptide synthase/polyketide synthase        | 83.97 |
| NC_007492 | LT629761    | P_chlororaphis_DSM_21509.gb         |      | arthrofactin-type cyclic lipopeptide synthetase A         | 82.91 |
| NC_007492 | NZ_CP020369 | P_tolaasii_2192T.gb                 |      | non-ribosomal peptide synthetase                          | 80.71 |
| NC_007492 | AE016853    | P_syringae_pv._tomato_str_DC3000.gb | syfA | non-ribosomal peptide synthetase SyfA                     | 81.43 |
| NC_007492 | NZ_LT629972 | P_fuscovaginae_LMG_2158.gb          |      | non-ribosomal peptide synthetase                          | 84.91 |
| NC_007492 | NZ_CP035088 | P_viciae_11K1.gb                    |      | non-ribosomal peptide synthase/polyketide synthase        | 86.00 |
| NC_007492 | NZ_CP005969 | P_syringae_pv._syringae_B301D.gb    |      | non-ribosomal peptide synthetase                          | 80.71 |
| NC_007492 | CT573326    | P_entomophilia_L48.gb               |      | putative non ribosomal peptide synthetase                 | 84.04 |

|           |                    |                                       |      |                                                           |       |
|-----------|--------------------|---------------------------------------|------|-----------------------------------------------------------|-------|
| NC_007492 | NC_020209          | P._poae_RE1_1_14.gb                   |      | non-ribosomal peptide synthetase                          | 84.16 |
| NC_007492 | NZ_CP005969        | P._syringae_pv._syringae_B301D.gb     | sypB | syringopeptin non-ribosomal peptide synthetase SypB       | 83.72 |
| NC_007492 | NC_007005          | P._syringae_pv._syringae_B728a.gb     | sypC | syringopeptin non-ribosomal peptide synthetase SypC       | 84.54 |
| NC_007492 | NC_007005          | P._syringae_pv._syringae_B728a.gb     |      | non-ribosomal peptide synthetase                          | 81.41 |
| NC_007492 | NZ_LT629777        | P._asplenii_ATCC_23835.gb             |      | non-ribosomal peptide synthetase                          | 80.46 |
| NC_007492 | CT573326           | P._entomophilia_L48.gb                |      | putative non-ribosomal peptide synthetase                 | 83.49 |
| NC_007492 | NZ_CP077074        | P._sessiliniogenes_CM12a.gb           |      | amino acid adenylation domain-containing protein          | 84.58 |
| NC_007492 | NZ_LT629777        | P._asplenii_ATCC_23835.gb             |      | non-ribosomal peptide synthetase/polyketide synthase      | 81.10 |
| NC_007492 | NZ_CP011789        | P._putida_PC2.gb                      |      | non-ribosomal peptide synthetase                          | 83.65 |
| NC_007492 | NZ_CP007410        | P._brassicacearum_DF41.gb             |      | non-ribosomal peptide synthetase                          | 83.50 |
| NC_007492 | NZ_AP014522        | P._protegens_Cab57.gb                 | ofaB | orfamide A non-ribosomal peptide synthetase OfaB          | 80.96 |
| NC_007492 | NZ_JAHSTY010000001 | P._azadiae_SWRI103.gb                 |      | amino acid adenylation domain-containing protein          | 83.37 |
| NC_007492 | NZ_CP035088        | P._viciae_11K1.gb                     |      | non-ribosomal peptide synthetase                          | 86.00 |
| NC_007492 | LT629761           | P._chlororaphis_DSM_21509.gb          |      | arthrofactin-type cyclic lipopeptide synthetase A         | 82.91 |
| NC_007492 | NZ_CP005969        | P._syringae_pv._syringae_B301D.gb     |      | non-ribosomal peptide synthetase                          | 85.09 |
| NC_007492 | NZ_CP005969        | P._syringae_pv._syringae_B301D.gb     | sypA | syringopeptin non-ribosomal peptide synthetase SypA       | 85.05 |
| NC_007492 | LT629761           | P._chlororaphis_DSM_21509.gb          |      | non-ribosomal peptide synthetase domain                   | 85.92 |
| NC_007492 | LT629761           | P._chlororaphis_DSM_21509.gb          |      | arthrofactin-type cyclic lipopeptide synthetase C         | 81.88 |
| NC_007492 | NZ_AP014522        | P._protegens_Cab57.gb                 | ofaA | orfamide A non-ribosomal peptide synthetase OfaA          | 84.11 |
| NC_007492 | NZ_LT629777        | P._asplenii_ATCC_23835.gb             |      | non-ribosomal peptide synthetase                          | 82.78 |
| NC_007492 | NZ_CP020369        | P._tolaasii_2192T.gb                  |      | amino acid adenylation domain-containing protein          | 84.30 |
| NC_007492 | NZ_CP077074        | P._sessiliniogenes_CM12a.gb           | macA | macrolide transporter subunit MacA                        | 82.13 |
| NC_007492 | NC_007005          | P._syringae_pv._syringae_B728a.gb     | macA | macrolide transporter subunit MacA                        | 82.20 |
| NC_007492 | NZ_JAHSTY010000001 | P._azadiae_SWRI103.gb                 | macA | macrolide transporter subunit MacA                        | 84.83 |
| NC_007492 | NC_020209          | P._poae_RE1_1_14.gb                   |      | macrolide transporter subunit MacA                        | 82.05 |
| NC_007492 | NZ_CP007039        | P._cichorii_JBC1.gb                   | macA | macrolide transporter subunit MacA                        | 84.62 |
| NC_007492 | NZ_CP007039        | P._cichorii_JBC1.gb                   | macA | macrolide transporter subunit MacA                        | 82.08 |
| NC_007492 | LT629761           | P._chlororaphis_DSM_21509.gb          |      | membrane fusion protein, macrolide-specific efflux system | 84.89 |
| NC_007492 | NC_021237          | P._protegens_CHA0.gb                  | macA | macrolide transporter subunit MacA                        | 84.03 |
| NC_007492 | CT573326           | P._entomophilia_L48.gb                | macA | macrolide efflux protein MacA                             | 83.81 |
| NC_007492 | LT629761           | P._chlororaphis_DSM_21509.gb          |      | membrane fusion protein, macrolide-specific efflux system | 84.89 |
| NC_007492 | AE016853           | P._syringae_pv._tomato_str._DC3000.gb | syfC | syringafactin efflux protein SyfC                         | 84.42 |
| NC_007492 | NZ_LT629790        | P._mediterranea_DSM_16733.gb          | macA | macrolide transporter subunit MacA                        | 82.62 |
| NC_007492 | NZ_CP006256        | P._syringae_pv._syringae_HS191.gb     | macA | macrolide transporter subunit MacA                        | 85.90 |
| NC_007492 | NZ_CP007410        | P._brassicacearum_DF41.gb             | macA | macrolide transporter subunit MacA                        | 83.59 |
| NC_007492 | CP027716           | P._chlororaphis_PBSt_2.gb             |      | Macrolide-specific efflux protein MacA                    | 84.62 |
| NC_007492 | NZ_CP029608        | P._kribbensensis_46_2.gb              |      | macrolide transporter subunit MacA                        | 93.65 |
| NC_007492 | NZ_CP009365        | P._soli_SJ10.gb                       | macA | macrolide transporter subunit MacA                        | 80.30 |
| NC_007492 | NC_004129          | P._protegens_Pf_5.gb                  | macA | macrolide transporter subunit MacA                        | 83.94 |
| NC_007492 | NZ_CM001513        | P._lactis_SS101.gb                    |      | macrolide transporter subunit MacA                        | 83.54 |
| NC_007492 | NZ_CP020369        | P._tolaasii_2192T.gb                  | macA | macrolide transporter subunit MacA                        | 83.11 |



|           |             |                                    |      |                                                             |       |
|-----------|-------------|------------------------------------|------|-------------------------------------------------------------|-------|
| NC_007492 | NZ_LT629778 | P_granadensis_LMG_27940.gb         | macA | macrolide transporter subunit MacA                          | 85.02 |
| NC_007492 | CP024085    | P_putida_E41.gb                    |      | macrolide transporter subunit MacA                          | 80.90 |
| NC_007492 | NZ_LT629777 | P_asplenii_ATCC_23835.gb           | macA | macrolide transporter subunit MacA                          | 82.58 |
| NC_007492 | NZ_AP014522 | P_protegens_Cab57.gb               | macA | macrolide transporter subunit MacA                          | 84.22 |
| NC_007492 | NZ_LT629972 | P_fuscovaginae_LMG_2158.gb         | macA | macrolide transporter subunit MacA                          | 82.14 |
| NC_007492 | NZ_CP023299 | P_mosselii_BS011.gb                | macA | macrolide transporter subunit MacA                          | 80.21 |
| NC_007492 | NC_012660   | P_fluorescens_SBW25.gb             |      | macrolide transporter subunit MacA                          | 82.90 |
| NC_007492 | CP028826    | P_fluorescens_MS82.gb              |      | macrolide transporter subunit MacA                          | 93.73 |
| NC_007492 | NZ_CP005969 | P_syringae_pv_syringae_B301D.gb    | macA | macrolide transporter subunit MacA                          | 82.20 |
| NC_007492 | NZ_CP035088 | P_viciae_11K1.gb                   | macA | macrolide transporter subunit MacA                          | 82.69 |
| NC_007492 | NZ_CP005969 | P_syringae_pv_syringae_B301D.gb    | macA | macrolide transporter subunit MacA                          | 82.20 |
| NC_007492 | NZ_CP020369 | P_tolaasii_2192T.gb                | macA | macrolide transporter subunit MacA                          | 85.05 |
| NC_007492 | NZ_CP077074 | P_sessiliniogenes_CM12a.gb         | macA | macrolide transporter subunit MacA                          | 82.54 |
| NC_007492 | NC_012660   | P_fluorescens_SBW25.gb             |      | MacB family efflux pump subunit                             | 83.39 |
| NC_007492 | AE016853    | P_syringae_pv_tomato_str_DC3000.gb | syfD | syringafactin efflux protein SyfD                           | 83.65 |
| NC_007492 | NZ_CP005969 | P_syringae_pv_syringae_B301D.gb    |      | MacB family efflux pump subunit                             | 80.37 |
| NC_007492 | NZ_CP006256 | P_syringae_pv_syringae_HS191.gb    |      | MacB family efflux pump subunit                             | 82.62 |
| NC_007492 | NZ_CP020369 | P_tolaasii_2192T.gb                |      | MacB family efflux pump subunit                             | 82.61 |
| NC_007492 | NC_020209   | P_poaie_RE1_1_14.gb                |      | MacB family efflux pump subunit                             | 84.69 |
| NC_007492 | CP028826    | P_fluorescens_MS82.gb              |      | macrolide ABC transporter permease/ATP-binding protein MacB | 93.20 |
| NC_007492 | NZ_LT629778 | P_granadensis_LMG_27940.gb         |      | MacB family efflux pump subunit                             | 86.55 |
| NC_007492 | NC_004129   | P_protegens_Pf_5.gb                |      | MacB family efflux pump subunit                             | 84.23 |
| NC_007492 | NZ_CP005969 | P_syringae_pv_syringae_B301D.gb    |      | MacB family efflux pump subunit                             | 80.37 |
| NC_007492 | CT573326    | P_entomophilina_L48.gb             | macB | macrolide ABC efflux protein MacB                           | 83.07 |
| NC_007492 | NZ_CP009365 | P_soli_SJ10.gb                     |      | MacB family efflux pump subunit                             | 83.15 |
| NC_007492 | NZ_LT629777 | P_asplenii_ATCC_23835.gb           |      | MacB family efflux pump subunit                             | 82.55 |
| NC_007492 | NZ_LT629777 | P_asplenii_ATCC_23835.gb           |      | MacB family efflux pump subunit                             | 83.37 |
| NC_007492 | LT629761    | P_chlororaphis_DSM_21509.gb        |      | macrolide transport system ATP-binding/permease protein     | 87.19 |
| NC_007492 | NZ_CM001513 | P_lactis_SS101.gb                  |      | MacB family efflux pump subunit                             | 84.89 |
| NC_007492 | CP027716    | P_chlororaphis_PBSt_2.gb           |      | Macrolide export ATP-binding/permease protein MacB          | 87.07 |
| NC_007492 | NZ_CP007039 | P_cichorii_JBC1.gb                 |      | MacB family efflux pump subunit                             | 82.62 |
| NC_007492 | NZ_CP077074 | P_sessiliniogenes_CM12a.gb         |      | MacB family efflux pump subunit                             | 83.23 |
| NC_007492 | NZ_CP011789 | P_putida_PC2.gb                    |      | MacB family efflux pump subunit                             | 82.16 |
| NC_007492 | NZ_CP077074 | P_sessiliniogenes_CM12a.gb         |      | MacB family efflux pump subunit                             | 84.09 |
| NC_007492 | NC_007005   | P_syringae_pv_syringae_B728a.gb    |      | MacB family efflux pump subunit                             | 80.51 |
| NC_007492 | LT629761    | P_chlororaphis_DSM_21509.gb        |      | macrolide transport system ATP-binding/permease protein     | 87.19 |
| NC_007492 | NC_021237   | P_protegens_CHA0.gb                |      | MacB family efflux pump subunit                             | 84.41 |
| NC_007492 | NZ_CP029608 | P_kribbensis_46_2.gb               | macB | MacB family efflux pump subunit                             | 92.74 |
| NC_007492 | NZ_LT629972 | P_fuscovaginae_LMG_2158.gb         |      | MacB family efflux pump subunit                             | 87.04 |
| NC_007492 | NZ_CP007410 | P_brassicacearum_DF41.gb           |      | MacB family efflux pump subunit                             | 82.72 |
| NC_007492 | NZ_CP007039 | P_cichorii_JBC1.gb                 |      | MacB family efflux pump subunit                             | 81.41 |

|           |                    |                                   |                                                               |       |
|-----------|--------------------|-----------------------------------|---------------------------------------------------------------|-------|
| NC_007492 | NZ_CP023299        | P._mosselii_BS011.gb              | MacB family efflux pump subunit                               | 83.57 |
| NC_007492 | NZ_AP014522        | P._protegens_Cab57.gb             | MacB family efflux pump subunit                               | 84.14 |
| NC_007492 | NZ_CP020369        | P._tolaasii_2192T.gb              | MacB family efflux pump subunit                               | 84.81 |
| NC_007492 | NZ_LT629972        | P._fuscovaginae_LMG_2158.gb       | MacB family efflux pump subunit                               | 83.46 |
| NC_007492 | CP024085           | P._putida_E41.gb                  | macrolide ABC transporter permease/ATP-binding protein MacB   | 84.92 |
| NC_007492 | NZ_JAHSTY010000001 | P._azadiae_SWRI103.gb             | MacB family efflux pump subunit                               | 87.02 |
| NC_007492 | NZ_CP035088        | P._viciae_11K1.gb                 | MacB family efflux pump subunit                               | 83.25 |
| NC_007492 | NZ_CM001513        | P._lactis_SS101.gb                | LuxR family transcriptional regulator                         | 89.17 |
| NC_007492 | NZ_LT629972        | P._fuscovaginae_LMG_2158.gb       | LuxR C-terminal-related transcriptional regulator             | 83.73 |
| NC_007492 | NZ_CP029608        | P._kribbensis_46_2.gb             | helix-turn-helix transcriptional regulator                    | 83.46 |
| NC_007492 | CP027716           | P._chlororaphis_PBST_2.gb         | Transcriptional regulator, LuxR family                        | 87.04 |
| NC_007492 | NZ_CP007410        | P._brassicacearum_DF41.gb         | helix-turn-helix transcriptional regulator                    | 82.99 |
| NC_007492 | NC_020209          | P._poae_RE1_1_14.gb               | LuxR family transcriptional regulator                         | 83.44 |
| NC_007492 | NZ_AP014522        | P._protegens_Cab57.gb             | helix-turn-helix transcriptional regulator                    | 81.07 |
| NC_007492 | NC_021237          | P._protegens_CHA0.gb              | LuxR family transcriptional regulator                         | 81.66 |
| NC_007492 | NZ_LT629777        | P._asplenii_ATCC_23835.gb         | LuxR C-terminal-related transcriptional regulator             | 83.73 |
| NC_007492 | NC_012660          | P._fluorescens_SBW25.gb           | LuxR family transcriptional regulator                         | 87.50 |
| NC_007492 | LT629761           | P._chlororaphis_DSM_21509.gb      | transcriptional regulator, LuxR family                        | 85.19 |
| NC_007492 | NZ_JAHSTY010000001 | P._azadiae_SWRI103.gb             | helix-turn-helix transcriptional regulator                    | 86.01 |
| NC_007492 | LT629761           | P._chlororaphis_DSM_21509.gb      | transcriptional regulator, LuxR family                        | 85.19 |
| NC_007492 | NZ_LT629778        | P._granadensis_LMG_27940.gb       | helix-turn-helix transcriptional regulator                    | 88.11 |
| NC_007492 | NC_004129          | P._protegens_Pf_5.gb              | helix-turn-helix transcriptional regulator                    | 81.66 |
| NC_007492 | NZ_CP020369        | P._tolaasii_2192T.gb              | helix-turn-helix transcriptional regulator                    | 87.61 |
| NC_007492 | NZ_CP011789        | P._putida_PC2.gb                  | LuxR family transcriptional regulator                         | 83.33 |
| NC_007492 | NZ_CP077074        | P._sessiliniigenes_CMR12a.gb      | LuxR C-terminal-related transcriptional regulator             | 85.19 |
| NC_007492 | CP028826           | P._fluorescens_MS82.gb            | LuxR family transcriptional regulator                         | 94.68 |
| NC_007492 | NZ_CP029608        | P._kribbensis_46_2.gb             | amino acid adenylation domain-containing protein              | 85.48 |
| NC_007492 | NC_004129          | P._protegens_Pf_5.gb              | non-ribosomal peptide synthetase                              | 83.65 |
| NC_007492 | NZ_LT629777        | P._asplenii_ATCC_23835.gb         | non-ribosomal peptide synthetase                              | 81.88 |
| NC_007492 | CT573326           | P._entomophila_L48.gb             | putative non-ribosomal peptide synthetase, terminal component | 81.73 |
| NC_007492 | NZ_CP029608        | P._kribbensis_46_2.gb             | amino acid adenylation domain-containing protein              | 83.65 |
| NC_007492 | NC_007005          | P._syringae_pv._syringae_B728a.gb | non-ribosomal peptide synthetase                              | 84.59 |
| NC_007492 | NZ_CP005969        | P._syringae_pv._syringae_B301D.gb | amino acid adenylation domain-containing protein              | 84.89 |
| NC_007492 | NZ_CP029608        | P._kribbensis_46_2.gb             | amino acid adenylation domain-containing protein              | 83.97 |
| NC_007492 | NZ_CP023299        | P._mosselii_BS011.gb              | amino acid adenylation domain-containing protein              | 81.14 |
| NC_007492 | NZ_LT629777        | P._asplenii_ATCC_23835.gb         | non-ribosomal peptide synthetase                              | 81.29 |
| NC_007492 | NZ_AP014522        | P._protegens_Cab57.gb             | non-ribosomal peptide synthetase                              | 84.00 |
| NC_007492 | NC_021237          | P._protegens_CHA0.gb              | non-ribosomal peptide synthetase                              | 83.65 |
| NC_007492 | NZ_CP029608        | P._kribbensis_46_2.gb             | amino acid adenylation domain-containing protein              | 80.91 |
| NC_007492 | NZ_LT629777        | P._asplenii_ATCC_23835.gb         | non-ribosomal peptide synthetase                              | 83.65 |
| NC_007492 | NZ_CP035088        | P._viciae_11K1.gb                 | non-ribosomal peptide synthase/polyketide synthase            | 84.68 |

|           |             |                                       |      |                                                     |       |
|-----------|-------------|---------------------------------------|------|-----------------------------------------------------|-------|
| NC_007492 | NC_012660   | P._fluorescens_SBW25.gb               |      | non-ribosomal peptide synthetase                    | 84.16 |
| NC_007492 | CP027716    | P._chlororaphis_PBSt_2.gb             |      | Peptide synthetase                                  | 82.32 |
| NC_007492 | NZ_LT629972 | P._fuscovaginae_LMG_2158.gb           |      | non-ribosomal peptide synthetase                    | 82.91 |
| NC_007492 | NZ_CP005969 | P._syringae_pv._syringae_B301D.gb     |      | amino acid adenylation domain-containing protein    | 84.89 |
| NC_007492 | CT573326    | P._entomophilia_L48.gb                |      | putative non-ribosomal peptide synthetase           | 82.63 |
| NC_007492 | CP028826    | P._fluorescens_MS82.gb                |      | non-ribosomal peptide synthetase                    | 80.91 |
| NC_007492 | NZ_LT629972 | P._fuscovaginae_LMG_2158.gb           |      | non-ribosomal peptide synthetase                    | 83.23 |
| NC_007492 | LT629761    | P._chlororaphis_DSM_21509.gb          |      | arthrofactin-type cyclic lipopeptide synthetase B   | 82.32 |
| NC_007492 | NZ_CP006256 | P._syringae_pv._syringae_HS191.gb     |      | non-ribosomal peptide synthetase                    | 84.89 |
| NC_007492 | NZ_LT629777 | P._asplenii_ATCC_23835.gb             |      | non-ribosomal peptide synthetase                    | 83.47 |
| NC_007492 | NZ_CP005969 | P._syringae_pv._syringae_B301D.gb     | sypB | syringopeptin non-ribosomal peptide synthetase SypB | 83.18 |
| NC_007492 | NZ_CP029608 | P._kribbensis_46_2.gb                 |      | amino acid adenylation domain-containing protein    | 83.33 |
| NC_007492 | NZ_CP007410 | P._brassicacearum_DF41.gb             |      | non-ribosomal peptide synthetase                    | 83.49 |
| NC_007492 | NZ_LT629972 | P._fuscovaginae_LMG_2158.gb           |      | non-ribosomal peptide synthetase                    | 81.73 |
| NC_007492 | NZ_LT629777 | P._asplenii_ATCC_23835.gb             |      | non-ribosomal peptide synthetase                    | 86.27 |
| NC_007492 | NZ_LT629972 | P._fuscovaginae_LMG_2158.gb           |      | non-ribosomal peptide synthetase                    | 81.44 |
| NC_007492 | CT573326    | P._entomophilia_L48.gb                |      | putative non ribosomal peptide synthetase           | 81.12 |
| NC_007492 | CP028826    | P._fluorescens_MS82.gb                |      | non-ribosomal peptide synthetase                    | 84.18 |
| NC_007492 | NZ_CP029608 | P._kribbensis_46_2.gb                 |      | amino acid adenylation domain-containing protein    | 90.85 |
| NC_007492 | NZ_CP005969 | P._syringae_pv._syringae_B301D.gb     | sypB | syringopeptin non-ribosomal peptide synthetase SypB | 83.18 |
| NC_007492 | CP027716    | P._chlororaphis_PBSt_2.gb             |      | Peptide synthetase                                  | 81.01 |
| NC_007492 | NC_020209   | P._poae_RE1_1_14.gb                   |      | non-ribosomal peptide synthetase                    | 84.26 |
| NC_007492 | NC_020209   | P._poae_RE1_1_14.gb                   |      | non-ribosomal peptide synthetase                    | 82.84 |
| NC_007492 | CP028826    | P._fluorescens_MS82.gb                |      | non-ribosomal peptide synthetase                    | 95.33 |
| NC_007492 | CT573326    | P._entomophilia_L48.gb                | psvA | pyoverdine synthetase A                             | 82.11 |
| NC_007492 | NZ_CP006256 | P._syringae_pv._syringae_HS191.gb     |      | non-ribosomal peptide synthase                      | 81.06 |
| NC_007492 | NZ_CP035088 | P._viciae_11K1.gb                     |      | non-ribosomal peptide synthetase                    | 83.78 |
| NC_007492 | AE016853    | P._syringae_pv._tomato_str._DC3000.gb | syfB | non-ribosomal peptide synthetase SyfB               | 80.75 |
| NC_007492 | LT629761    | P._chlororaphis_DSM_21509.gb          |      | arthrofactin-type cyclic lipopeptide synthetase B   | 82.32 |
| NC_007492 | NZ_CP006256 | P._syringae_pv._syringae_HS191.gb     |      | non-ribosomal peptide synthetase                    | 82.07 |
| NC_007492 | CT573326    | P._entomophilia_L48.gb                |      | putative non-ribosomal peptide synthetase           | 82.89 |
| NC_007492 | NZ_LT629777 | P._asplenii_ATCC_23835.gb             |      | non-ribosomal peptide synthetase                    | 83.04 |
| NC_007492 | NZ_CP029608 | P._kribbensis_46_2.gb                 |      | amino acid adenylation domain-containing protein    | 90.01 |
| NC_007492 | NZ_LT629972 | P._fuscovaginae_LMG_2158.gb           |      | non-ribosomal peptide synthetase                    | 81.18 |
| NC_007492 | NZ_CP005969 | P._syringae_pv._syringae_B301D.gb     |      | amino acid adenylation domain-containing protein    | 82.05 |
| NC_007492 | NZ_CP029608 | P._kribbensis_46_2.gb                 |      | amino acid adenylation domain-containing protein    | 84.62 |
| NC_007492 | NZ_CM001513 | P._lactis_SS101.gb                    |      | non-ribosomal peptide synthetase                    | 80.77 |
| NC_007492 | NC_007005   | P._syringae_pv._syringae_B728a.gb     |      | non-ribosomal peptide synthetase                    | 81.85 |
| NC_007492 | NZ_LT629972 | P._fuscovaginae_LMG_2158.gb           |      | non-ribosomal peptide synthetase                    | 84.40 |
| NC_007492 | NZ_CP020369 | P._tolaasii_2192T.gb                  |      | non-ribosomal peptide synthetase                    | 82.12 |
| NC_007492 | CP028826    | P._fluorescens_MS82.gb                |      | non-ribosomal peptide synthetase                    | 95.50 |

|           |             |                                   |                                                                    |       |
|-----------|-------------|-----------------------------------|--------------------------------------------------------------------|-------|
| NC_007492 | NZ_CP006256 | P._syringae_pv._syringae_HS191.gb | non-ribosomal peptide synthetase                                   | 83.33 |
| NC_007492 | NZ_CP006256 | P._syringae_pv._syringae_HS191.gb | non-ribosomal peptide synthetase                                   | 82.87 |
| NC_007492 | CT573326    | P._entomophila_L48.gb             | putative non-ribosomal peptide synthetase                          | 82.77 |
| NC_007492 | NZ_CP029608 | P._kribbensis_46_2.gb             | amino acid adenylation domain-containing protein                   | 84.43 |
| NC_007492 | NZ_LT629777 | P._asplenii_ATCC_23835.gb         | non-ribosomal peptide synthetase                                   | 83.33 |
| NC_007492 | NC_012660   | P._fluorescens_SBW25.gb           | non-ribosomal peptide synthetase                                   | 81.89 |
| NC_007492 | NZ_CP005969 | P._syringae_pv._syringae_B301D.gb | non-ribosomal peptide synthetase                                   | 81.95 |
| NC_007492 | NZ_LT629972 | P._fuscovaginae_LMG_2158.gb       | non-ribosomal peptide synthetase                                   | 81.76 |
| NC_007492 | NZ_LT629777 | P._asplenii_ATCC_23835.gb         | non-ribosomal peptide synthetase                                   | 80.11 |
| NC_007492 | NC_007005   | P._syringae_pv._syringae_B728a.gb | non-ribosomal peptide synthetase                                   | 82.69 |
| NC_007492 | NZ_CP029608 | P._kribbensis_46_2.gb             | amino acid adenylation domain-containing protein                   | 80.91 |
| NC_007492 | NZ_CP005969 | P._syringae_pv._syringae_B301D.gb | non-ribosomal peptide synthetase                                   | 81.95 |
| NC_007492 | NZ_LT629777 | P._asplenii_ATCC_23835.gb         | non-ribosomal peptide synthetase                                   | 81.76 |
| NC_007492 | NZ_CP029608 | P._kribbensis_46_2.gb             | amino acid adenylation domain-containing protein                   | 84.11 |
| NC_007492 | NZ_CP005969 | P._syringae_pv._syringae_B301D.gb | amino acid adenylation domain-containing protein                   | 82.05 |
| NC_007492 | NZ_LT629778 | P._granadensis_LMG_27940.gb       | non-ribosomal peptide synthetase                                   | 81.10 |
| NC_007492 | NC_007005   | P._syringae_pv._syringae_B728a.gb | amino acid adenylation domain-containing protein                   | 83.52 |
| NC_007492 | NZ_CP005969 | P._syringae_pv._syringae_B301D.gb | hybrid non-ribosomal peptide synthetase/type I polyketide synthase | 83.52 |
| NC_007492 | NZ_LT629777 | P._asplenii_ATCC_23835.gb         | non-ribosomal peptide synthetase                                   | 83.96 |
| NC_007492 | CT573326    | P._entomophila_L48.gb             | putative Polyketide Synthase (terminal component)                  | 85.71 |
| NC_007492 | NZ_CP006256 | P._syringae_pv._syringae_HS191.gb | SDR family NAD(P)-dependent oxidoreductase                         | 85.48 |
| NC_007492 | NZ_LT629972 | P._fuscovaginae_LMG_2158.gb       | non-ribosomal peptide synthetase                                   | 83.96 |
| NC_007492 | CP028826    | P._fluorescens_MS82.gb            | non-ribosomal peptide synthetase                                   | 94.90 |
| NC_007492 | NZ_CP005969 | P._syringae_pv._syringae_B301D.gb | hybrid non-ribosomal peptide synthetase/type I polyketide synthase | 83.52 |
| NC_007492 | NZ_CP029608 | P._kribbensis_46_2.gb             | amino acid adenylation domain-containing protein                   | 83.26 |
